# Supplementary material for: A survey of acute self-reported infections in pregnancy
Source: PubMed Central journal article supplement — BMJ Open. 2011 May 12;1(1):e000083. doi: 10.1136/bmjopen-2011-000083 (PMC3191429; doi:10.1136/bmjopen-2011-000083), 2011-05-12
Supplement: bmjopen-2011-000083.draft_revisions.pdf [file bmjopen-2011-000083.draft_revisions.pdf]

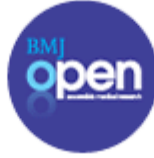

## A prevalence survey of acute self-reported infections in pregnancy

|                               |                                                                                                                                                                                                                                                                                                                                                                                                              |
|-------------------------------|--------------------------------------------------------------------------------------------------------------------------------------------------------------------------------------------------------------------------------------------------------------------------------------------------------------------------------------------------------------------------------------------------------------|
| Journal:                      | <i>BMJ Open</i>                                                                                                                                                                                                                                                                                                                                                                                              |
| Manuscript ID:                | bmjopen-2011-000083                                                                                                                                                                                                                                                                                                                                                                                          |
| Article Type:                 | Research                                                                                                                                                                                                                                                                                                                                                                                                     |
| Date Submitted by the Author: | 31-Jan-2011                                                                                                                                                                                                                                                                                                                                                                                                  |
| Complete List of Authors:     | Lain, Samantha; Kolling Institute of Medical Research, Perinatal Research<br>Roberts, Christine; Kolling Institute of Medical Research, Perinatal Research<br>Warning, Julia; Kolling Institute of Medical Research, Perinatal Research<br>Vivian-Taylor, Josephine; University of Sydney, Department of Obstetrics and Gynaecology<br>Ford, Jane; Kolling Institute of Medical Research, Perinatal Research |
| <b>Subject Heading</b>:       | Obstetrics & gynaecology                                                                                                                                                                                                                                                                                                                                                                                     |
| Keywords:                     | Maternal medicine < OBSTETRICS, Prenatal diagnosis < OBSTETRICS, PERINATOLOGY, QUALITATIVE RESEARCH                                                                                                                                                                                                                                                                                                          |
|                               |                                                                                                                                                                                                                                                                                                                                                                                                              |

SCHOLARONE™  
Manuscripts

1  
2  
3 **A prevalence survey of acute self-reported infections**  
4  
5  
6 **in pregnancy**  
7  
8

9  
10 **Running head:** Prevalence of acute infections in pregnancy  
11

12 **Word count:** Main text – 2,113 words, Abstract – 190 words  
13  
14  
15  
16  
17  
18  
19  
20  
21  
22  
23  
24  
25  
26  
27  
28  
29  
30  
31  
32  
33  
34  
35  
36  
37  
38  
39  
40  
41  
42  
43  
44  
45  
46  
47  
48  
49  
50  
51  
52  
53  
54  
55  
56  
57  
58  
59  
60

For peer review only

## Abstract

### *Objective*

The objective of this study was to estimate the weekly prevalence of the onset of self-reported infection in women at least 20 weeks pregnant.

### *Design*

We conducted a survey of pregnant women in a hospital antenatal clinic in Sydney Australia between August 2008 and April 2009. Women were asked to report whether they had an infection in the seven days prior to completing the questionnaire, and were asked details of symptoms and medication taken.

### *Results*

A total of 737 women at least 20 weeks pregnant completed the survey; 94% of women approached. Five per cent of the questionnaires completed reported the onset of an infection in the seven days prior to survey completion. When symptoms were analysed, 3.5% of women were classified as having a moderate or severe infection in the past seven days. The most common infection reported was a cold/upper respiratory tract infection followed by gastroenteritis. Women pregnant with their first child had a lower rate of self-reported infection than women who had other children (2.9% vs 7.2%).

### *Conclusions*

These results can be used to inform future research examining acute infection as a trigger for pregnancy complications.

**Key words:** pregnancy, infection, prevalence, obstetrics, crossover studies

## Article summary

### Article focus

- Survey to ascertain the prevalence of the onset of infections in any seven day period during the second half of pregnancy
- Information regarding type of infection and medication taken to treat infection were also collected

### Key message:

- Five per cent of women at least 20 weeks pregnant reported the onset of an infection in the prior seven days, 3.5% of these women had a moderate or severe infection
- Only 21% of women reporting an infection sought medical care while 65% took medication to treat the infection
- This information can be used to inform future research into acute infections as a possible trigger for pregnancy complications such as pre-eclampsia.

### Strengths and limitations of this study:

- Strengths include the estimate of prevalence of infection in a short-term window of time rather than at any time during pregnancy to inform research into acute triggers of pregnancy complications, and the use of information regarding symptoms and medication taken to distinguish between mild and more severe infections.
- Limitations include the use of self-reported infection however this is a tool that has previously been used to report infection in a number of populations.

### **Funding Statement**

Samantha Lain is supported by a National Health and Medical Research Council (NHMRC) Postgraduate Scholarship (571227). Christine Roberts is supported by a National Health and Medical Research Council (NHMRC) Senior Research Fellowship. Jane Ford is supported by an NHMRC Capacity Building Grant in Population Health Research.

### **Competing interests statement**

The author(s) declare that they have no competing interests.

### **Authors' contributions and acknowledgements**

SJL designed and administered the survey, analysed data and drafted manuscript.

CLR and JBF developed the study and helped design survey. CLR, JBF, JVT and JW contributed to data analysis and interpretation. All authors edited the manuscript and gave final approval of the version to be published.

We wish to acknowledge the help of research midwives Kristen Rickard, Jill Milligan and Jocelyn Segley with administering surveys in the antenatal clinic.

## Background

Acute infections during pregnancy are associated with adverse outcomes including miscarriage, preterm prelabour rupture of membranes, preterm birth and stillbirth<sup>1-3</sup>. Epidemiological evidence suggests that maternal infections may precipitate other complications of pregnancy including preeclampsia<sup>4</sup>. Early pregnancy evokes a mild and limited systemic inflammatory response with increased levels of pro-inflammatory mediators such as prostaglandin E<sub>2</sub> (PGE<sub>2</sub>), tumor necrosis factor (TNF)- $\alpha$ <sup>5</sup>, interleukins 1 and 6.<sup>6,7</sup> These inflammatory mediators promote vascular remodelling and placental invasion, necessary in early pregnancy to ensure adequate fetal growth. The placenta reaches its full size by about 20 weeks. Vascular remodelling is complete, and as expected, a concurrent decrease in circulating inflammatory markers has been observed.<sup>8-10</sup> In clinically normal pregnancies, maternal inflammation remains subdued until the onset of labour, when PGE<sub>2</sub> and proinflammatory cytokines mediate the ripening of the cervix, rupture of membranes, and myometial contractility.<sup>11,12</sup> Therefore, acute infection may trigger perturbations in the temporal control of maternal inflammation, causing adverse pregnancy outcomes.<sup>13,14</sup> The maternal immune response to such an infection could mimic the cytokine milieu involved in the onset of labour.

Previous studies in pregnancy have centred on specific infections such as urinary tract infection and periodontal disease rather than investigating prevalence of all infections which may evoke an inflammatory response. Acute infectious episodes are known to increase the risk of cardiovascular diseases (CVD) including the risk of first-time myocardial infarction and stroke. Studies of these diseases suggest the effect of infection may be generic and not linked to specific types of infection.<sup>15</sup> The current

1  
2  
3 study arose out of the design phase of a similar study among pregnant women, to  
4 investigate the possible role of infection and other acute triggers in the onset of  
5 preeclampsia, an acute hypertensive disorder of pregnancy. An accurate estimate of  
6 the prevalence rate of infections during the second half of pregnancy (when women  
7 are at risk of preeclampsia) is necessary to calculate the study sample size; a simple  
8 overall infection rate will not suffice when assessing acute triggers. Few studies have  
9 assessed the prevalence of acute infections during pregnancy and none have addressed  
10 the specific issue of timing during pregnancy<sup>4</sup>. Use of 'infection at any time during  
11 during pregnancy' may result in systematic misclassification of exposure and dilution  
12 of the true risk of complications occurring later in pregnancy. The aim of this current  
13 study is to ascertain the prevalence of the onset of infections in any seven day period  
14 during the second half of pregnancy.  
15  
16  
17  
18  
19  
20  
21  
22  
23  
24  
25  
26  
27  
28  
29  
30  
31

### 32 **Methods**

33  
34 The study was conducted in the antenatal clinic of a teaching hospital with tertiary  
35 obstetric and neonatal care facilities in Sydney, Australia between August 2008 and  
36 April 2009. Methods have been described in detail previously in a separate report of  
37 recent activities during pregnancy<sup>16</sup>. Briefly, women who were at least 20 weeks  
38 pregnant and able to complete the questionnaire in English were eligible. Women  
39 were approached in the antenatal clinic by a trained researcher not involved in their  
40 medical care and completed a short questionnaire after giving informed consent. The  
41 questionnaire was developed from a review of literature and discussion with clinical  
42 staff and was piloted prior to study commencement.  
43  
44  
45  
46  
47  
48  
49  
50  
51  
52  
53  
54  
55  
56  
57  
58

59 The questionnaire asked women about demographic characteristics and whether they  
60 had an infection during their pregnancy. Other studies have similarly identified recent

1  
2  
3 infections using self-report<sup>17-21</sup> and concordance studies find this to be reliable<sup>22-25</sup>. In  
4  
5 the questionnaire, infection was defined as “symptoms lasting more than 24 hours that  
6  
7 you think were caused by an infection”. Participants were also prompted with a list of  
8  
9 examples such as a cold or flu, urinary tract infection, thrush, tooth abscess or an  
10  
11 infected wound when considering if they had an infection in the past seven days. The  
12  
13 questionnaire sought information about infection in the seven days prior to its  
14  
15 completion, so women were eligible to complete the survey more than once,  
16  
17 providing there was at least fourteen days between each questionnaire. If the women  
18  
19 responded that they had an infection in the last 7 days they were asked to record  
20  
21 perceived severity (mild, moderate or severe) of symptoms from a provided list (see  
22  
23 Figure 1). Details were also collected regarding medical advice sought, tests received  
24  
25 and medication taken for their infection. Details of symptoms and medication were  
26  
27 used to analyse severity of infections. Women who had taken antibiotics or had three  
28  
29 or more symptoms that they rated as moderate or severe were classified as having a  
30  
31 ‘moderate/severe’ infection. As the timing of the onset of infection was important,  
32  
33 women were given a calendar to help prompt them with the date of onset of infection  
34  
35 and were also asked how confident they were of the date the infection first appeared.  
36  
37  
38  
39  
40  
41  
42  
43  
44  
45

46 Survey data were analysed using frequency tabulations and contingency table  
47  
48 analyses. Stratified analysis, using chi square tests, examined the impact of gestational  
49  
50 age, parity, plurality, maternal education and other medical conditions on the  
51  
52 prevalence of infection. This study was approved by the Northern Sydney and  
53  
54 Central Coast Human Research Ethics Committee.  
55  
56  
57  
58  
59  
60



## Results

Among women who were at least 20 weeks pregnant approached to complete the survey, 738 (94%) agreed to participate; 97% when approached for the first time and 87% when approached to complete the survey for a subsequent time. A total of 737 surveys were completed, including 161 women completed the survey more than once. The only significant difference between women completing the survey more than once and those who only completed one survey was increased gestational age. The majority of the women that completed the survey were over 30 years of age, had a University degree, and were having their first baby (see Table 1).

Forty per cent of women surveyed said that they had had an infection at some stage during their pregnancy. Five per cent of the surveys completed reported the onset of an infection in the seven days prior to survey completion (see Table 2) and 5.7% reported the onset of an infection 7 to 14 days before completing survey. For women who reported an infection in the seven days prior to completing the survey, the most common infection was a cold/upper respiratory tract infection with a prevalence rate of 2.6%, followed by gastroenteritis or vomiting (0.7%), influenza (0.5%), candidiasis (0.4%) and urinary tract infection (0.4%). When only 'moderate/severe' infections were examined, the weekly prevalence of the onset of any infection decreased to 3.5% and the prevalence of the onset of a cold/upper respiratory tract infection in the seven days prior to survey completion decreased to 1.2%.

Table 2 shows the weekly prevalence of the onset of infection by demographic and pregnancy variables. The prevalence of onset of infection differed significantly by parity, plurality and for women who had high blood pressure. Less women who were

1  
2  
3 pregnant for the first time reported the onset of an infection compared to women who  
4  
5 were pregnant for a second or subsequent time (2.9% vs 7.2%,  $p = 0.008$ ). Women  
6  
7 who were pregnant with twins reported a higher prevalence of infection than women  
8  
9 pregnant with a singleton (16.1% vs 4.5%,  $p = 0.004$ ), however there was no  
10  
11 difference between groups in the prevalence of moderate/severe infection. Women  
12  
13 that reported having a hypertensive disorder of pregnancy reported more infection  
14  
15 than women without a medical condition (15.3% vs 4.6%,  $p = 0.01$ ).  
16  
17  
18  
19  
20  
21

22 Of those women reporting an infection in the seven days prior to survey completion,  
23  
24 the proportion who sought medical advice or took medication are outlined in Table 3.  
25  
26 Twenty one per cent of women with an infection saw a health care professional and  
27  
28 65% took some type of medication to treat the infection. Most commonly  
29  
30 paracetamol /acetaminophen was taken, followed by antibiotics and 5% of women  
31  
32 with an infection reported taking aspirin. Just over 50% of women reporting an  
33  
34 infection stated that they had a fever and a third of these women reported having their  
35  
36 temperature taken. The two women that reported having an investigative test  
37  
38 performed had urine samples taken for urinary tract infections. The highest rates of  
39  
40 onset of any infection in the seven days prior to the survey were in the southern  
41  
42 hemisphere winter month of August (11.5%) while January (summer) had the lowest  
43  
44 infection rate (0.6%). Most women (92%) were confident or very confident of the  
45  
46 date when symptoms of infection first appeared.  
47  
48  
49  
50  
51  
52

## 53 Discussion

54  
55 This is the first study to look at the prevalence of infection in a seven day window in  
56  
57 pregnant women. There are a number of studies that report the prevalence of select  
58  
59 infections at any time during pregnancy and it is necessary to estimate weekly rates  
60

1  
2  
3 for comparison to these studies. Our study found a lower prevalence of self-reported  
4 infection during the whole pregnancy (40%) than Collier *et al*<sup>17</sup> (64%) however they  
5 included first trimester. Weekly rates for specific infections in pregnancy reported in  
6 other studies include: urinary tract infection 0.2% to 0.5%<sup>17 26,27</sup> (similar to 0.4%  
7 reported in our study), gastroenteritis 0.8%<sup>20</sup> (0.7% in this study), influenza 0.1%<sup>27</sup>  
8 (0.5% in this study), acute respiratory infectious disease 0.2%<sup>28</sup> and the common cold  
9 0.4%<sup>29</sup> (compared to 1.2% of moderate/severe upper respiratory tract infections  
10 reported in this study). Our study has a higher prevalence rate for the common cold  
11 however a population-based cohort study in Canada found the weekly rate of acute  
12 respiratory illness severe enough to require a physician visit ranged from 1.1% to  
13 1.9%<sup>30</sup>, similar to the prevalence rate of severe colds observed in this study.  
14  
15  
16  
17  
18  
19  
20  
21  
22  
23  
24  
25  
26  
27  
28  
29  
30  
31

32 We found the prevalence of the onset of infection was higher for women who had  
33 previously been pregnant. Children are prone to developing infections<sup>20</sup> which could  
34 be easily transferred to the mother. An unexpected yet interesting finding from the  
35 survey was the increased prevalence of infection in women with a hypertensive  
36 disorder of pregnancy, although the confidence intervals around the prevalence  
37 estimate are very wide. This result is of particular interest because the estimate of  
38 prevalence of infection in pregnant women from this survey is to inform future  
39 research about infection and preeclampsia. The authors propose using the prevalence  
40 estimates of infection obtained from the current study for a case-crossover study  
41 investigating the role of acute infection and other acute triggers in the onset of  
42 preeclampsia. The current study however was not designed to examine infection rates  
43 in pregnant women with hypertension. In this cross-sectional survey it was not  
44 possible to establish whether the hypertension or the infection occurred first.  
45  
46  
47  
48  
49  
50  
51  
52  
53  
54  
55  
56  
57  
58  
59  
60

1  
2  
3  
4  
5  
6 The reliance upon self-report of infection is a potential limitation of the study with  
7  
8 only 21% of women reporting an infection seeking medical attention, however mild  
9  
10 infections that do not come to medical attention may still be a risk for pregnancy  
11  
12 complications<sup>17</sup>. Self-report of infection has been used to estimate prevalence of  
13  
14 gastroenteritis<sup>20</sup>, influenza and fever<sup>19 21</sup>, and genitourinary infections<sup>18</sup> in pregnant  
15  
16 women. Banhidý *et al* collected information about infection both from prospectively  
17  
18 collected medical data and self-report from women in a post-natal questionnaire<sup>25 28</sup>.  
19  
20 They found that 74% of women reporting an acute respiratory disease during  
21  
22 pregnancy had the disease recorded in their medical records<sup>28</sup> and 95% of women  
23  
24 with a medically recorded urinary tract infection self-reported the infection<sup>25</sup>. Our  
25  
26 study also collected information about severity of symptoms experienced and  
27  
28 medication taken which helped to distinguish between mild and more severe  
29  
30 infections. This stratified analysis of reported infections increases the certainty that  
31  
32 women who experienced a severe infection truly did have an infection.  
33  
34  
35  
36  
37  
38  
39  
40

41 The use of self reported data may be affected by recall bias. One study using self-  
42  
43 report of any infection during pregnancy recommended ‘future studies should  
44  
45 emphasize the importance of interviewing women as early as possible’<sup>17</sup> as mother’s  
46  
47 tend to under-report infection when recalling information after birth<sup>31</sup>. The short  
48  
49 window of time to recall details of infection in our study (seven days) minimises this  
50  
51 recall bias.  
52  
53  
54  
55  
56  
57

58 A further limitation of this study is that the study population is older than the general  
59  
60 population of pregnant women in Australia<sup>26</sup>, is highly educated and was restricted to

1  
2  
3 English speaking participants. Although this may impact the generalisability of the  
4 results, such characteristics are representative of the women that attend this hospital.  
5  
6 Notably age or education level did not have a significant effect on the infection rate.  
7  
8 Strengths of this paper include the investigation of any infection rather than being  
9 limited to single infections; and the investigation of acute rather than longer-term  
10 infections which may be over-estimated if weekly prevalence rates rather than date of  
11 infection onset are used.  
12  
13  
14  
15  
16  
17  
18  
19  
20

## 21 **Conclusions**

22  
23 This survey is the first study to estimate the weekly prevalence of infection in a  
24 population of pregnant women. The results of this study will be used to inform future  
25 research examining the association between acute infection and pregnancy  
26 complications such as preeclampsia. This study also informs clinicians about the  
27 types of infections and medications pregnant women are exposed to.  
28  
29  
30  
31  
32  
33  
34  
35  
36  
37  
38  
39  
40  
41  
42  
43  
44  
45  
46  
47  
48  
49  
50  
51  
52  
53  
54  
55  
56  
57  
58  
59  
60

Table 1: The characteristics of women surveyed

|                                                               | N (%)      |
|---------------------------------------------------------------|------------|
| <b>All surveys completed</b>                                  | 737        |
| Women that have completed survey only once                    | 576 (78.2) |
| <b>Maternal age</b>                                           |            |
| < 25 years                                                    | 55 (7.5)   |
| 25 – 34 years                                                 | 430 (58.3) |
| ≥ 35 years                                                    | 247 (33.5) |
| <b>Gestational age</b>                                        |            |
| 20 – 28 weeks                                                 | 241 (32.7) |
| 29 – 34 weeks                                                 | 172 (23.3) |
| 35 – 42 weeks                                                 | 324 (44.0) |
| <b>Plurality</b>                                              |            |
| Singleton                                                     | 705 (95.7) |
| Twins/Triplets                                                | 31 (4.2)   |
| <b>Parity</b>                                                 |            |
| Nulliparous                                                   | 376 (51.0) |
| Multiparous                                                   | 360 (48.8) |
| <b>Highest level of education completed</b>                   |            |
| Without University degree                                     | 313 (42.5) |
| With University degree                                        | 422 (57.3) |
| <b>Medical conditions (pre-existing or pregnancy related)</b> |            |

|                       |            |
|-----------------------|------------|
| No medical conditions | 564 (76.5) |
| Asthma                | 69 (9.4)   |
| High blood pressure   | 25 (3.4)   |
| Diabetes              | 46 (6.2)   |
| Other                 | 32 (4.3)   |

**Smoking status**

|                                    |            |
|------------------------------------|------------|
| Did not smoke during pregnancy     | 708 (96.1) |
| Smoked cigarettes during pregnancy | 29 (3.9)   |

---

Table 2: The characteristics of women without and without a self-reported infection, and the weekly prevalence rate, per 100 surveys, of infection in the seven days prior to completing the survey

|                                             | Women with self-reported infection | Weekly prevalence of self-reported infection |
|---------------------------------------------|------------------------------------|----------------------------------------------|
|                                             | N                                  | % (95% CI)                                   |
| <b>All surveys completed</b>                | 37                                 | 5.0 [3.4 – 6.6]                              |
| Women that have completed survey only once  | 28                                 | 4.8 [3.1 – 6.6]                              |
| <b>Maternal age</b>                         |                                    |                                              |
| < 25 years                                  | 3                                  | 5.5 [0.0 – 10.7]                             |
| 25 – 34 years                               | 18                                 | 4.2 [2.3 – 6.1]                              |
| ≥ 35 years                                  | 16                                 | 6.5 [3.4 – 9.6]                              |
| <b>Gestational age</b>                      |                                    |                                              |
| 20 – 28 weeks                               | 10                                 | 4.2 [1.6 – 6.7]                              |
| 29 – 34 weeks                               | 9                                  | 5.2 [1.9 – 8.6]                              |
| 35 – 42 weeks                               | 18                                 | 5.6 [3.0 – 8.1]                              |
| <b>Plurality</b>                            |                                    |                                              |
| Singleton                                   | 32                                 | 4.5 [3.0 – 6.1]                              |
| Twins/Triplets                              | 5                                  | 16.1 [2.4 – 29.8]                            |
| <b>Parity</b>                               |                                    |                                              |
| Nulliparous                                 | 11                                 | 2.9 [1.2 – 4.6]                              |
| Multiparous                                 | 26                                 | 7.2 [4.5 – 9.9]                              |
| <b>Highest level of education completed</b> |                                    |                                              |



|                           |    |                 |
|---------------------------|----|-----------------|
| Without University degree | 14 | 4.5 [2.2 – 6.8] |
| With University degree    | 23 | 5.5 [3.3 – 7.6] |

**Medical conditions (pre-existing  
or pregnancy related)**

|                       |    |                   |
|-----------------------|----|-------------------|
| No medical conditions | 26 | 4.6 [2.9 – 6.3]   |
| Asthma                | 4  | 5.8 [0.1 – 11.5]  |
| High blood pressure   | 4  | 15.3 [0.5 – 30.2] |
| Diabetes              | 3  | 6.5 [0.0 – 13.9]  |
| Other                 | 0  | 0.0               |

**Smoking status**

|                                    |    |                  |
|------------------------------------|----|------------------|
| Did not smoke during pregnancy     | 36 | 5.1, [3.5 – 6.7] |
| Smoked cigarettes during pregnancy | 1  | 3., [0.0 – 10.5] |

---

Table 3. Medication taken or health advice sought by women with self-reported infection

|                                      | N  | %     |
|--------------------------------------|----|-------|
|                                      | 37 |       |
| <i>Medication taken</i>              |    |       |
| Paracetamol /acetaminophen           | 12 | 32.4% |
| Aspirin                              | 2  | 5.4%  |
| Antibiotics                          | 7  | 18.9% |
| None                                 | 3  | 8.1%  |
| Other*                               | 13 | 35.1% |
| <i>Medical Care</i>                  |    |       |
| Advice sought from doctor            | 8  | 21.6% |
| Medical test/investigation performed | 2  | 5.4%  |
| Temperature taken                    | 7  | 18.9% |

\*Includes antifungal cream, antibacterial throat lozenges and gargle

1  
2  
3 Figure 1. List of symptoms that participants who reported having an infection were  
4  
5 asked about details of severity (none, mild, moderate or severe)  
6  
7  
8  
9

10 See attached file  
11  
12  
13  
14  
15  
16  
17  
18  
19  
20  
21  
22  
23  
24  
25  
26  
27  
28  
29  
30  
31  
32  
33  
34  
35  
36  
37  
38  
39  
40  
41  
42  
43  
44  
45  
46  
47  
48  
49  
50  
51  
52  
53  
54  
55  
56  
57  
58  
59  
60

For peer review only

1. Brocklehurst P. Infection and preterm delivery. *BMJ* 1999;318(7183):548-9.
2. Goldenberg RL, Hauth JC, Andrews WW. Intrauterine infection and preterm delivery. *N Engl J Med* 2000;342(20):1500-7.
3. Goldenberg RL, McClure EM, Saleem S, Reddy UM. Infection-related stillbirths. *Lancet* 2010;375(9724):1482-90.
4. Conde-Agudelo A, Villar J, Lindheimer M. Maternal infection and risk of preeclampsia: systematic review and metaanalysis. *Am J Obstet Gynecol* 2008;198(1):7-22.
5. Kupferminc MJ, Peaceman AM, Wigton TR, Tamura RK, Rehnberg KA, Socol ML. Immunoreactive tumor necrosis factor-alpha is elevated in maternal plasma but undetected in amniotic fluid in the second trimester. *Am J Obstet Gynecol* 1994;171(4):976-9.
6. Rustveld LO, Kelsey SF, Sharma R. Association between maternal infections and preeclampsia: a systematic review of epidemiologic studies. *Matern Child Health J* 2008;12(2):223-42.
7. Gabay C, Kushner I. Acute-phase proteins and other systemic responses to inflammation. *N Engl J Med* 1999;340(6):448-54.
8. Elenkov IJ, Wilder RL, Bakalov VK, Link AA, Dimitrov MA, Fisher S, et al. IL-12, TNF-alpha, and hormonal changes during late pregnancy and early postpartum: implications for autoimmune disease activity during these times. *J Clin Endocrinol Metab* 2001;86(10):4933-8.
9. Luppi P, Haluszczak C, Betters D, Richard CA, Trucco M, DeLoia JA. Monocytes are progressively activated in the circulation of pregnant women. *J Leukoc Biol* 2002;72(5):874-84.
10. McCracken SA, Hadfield K, Rahimi Z, Gallery ED, Morris JM. NF-kappaB-regulated suppression of T-bet in T cells represses Th1 immune responses in pregnancy. *Eur J Immunol* 2007;37(5):1386-96.
11. Romero R, Munoz H, Gomez R, Parra M, Polanco M, Valverde V, et al. Increase in prostaglandin bioavailability precedes the onset of human parturition. *Prostaglandins Leukot Essent Fatty Acids* 1996;54(3):187-91.
12. Yuan M, Jordan F, McInnes IB, Harnett MM, Norman JE. Leukocytes are primed in peripheral blood for activation during term and preterm labour. *Mol Hum Reprod* 2009;15(11):713-24.
13. Redman CW, Sargent IL. Latest advances in understanding preeclampsia. *Science* 2005;308(5728):1592-4.
14. von Dadelszen P, Magee LA. Could an infectious trigger explain the differential maternal response to the shared placental pathology of preeclampsia and normotensive intrauterine growth restriction? *Acta Obstet Gynecol Scand* 2002;81(7):642-648.
15. Smeeth L, Thomas SL, Hall AJ, Hubbard R, Farrington P, Vallance P. Risk of myocardial infarction and stroke after acute infection or vaccination. *N Engl J Med* 2004;351(25):2611-8.
16. Lain SJ, Ford JB, Hadfield RM, Roberts CL. A prevalence survey of every-day activities in pregnancy. *BMC Pregnancy and Childbirth* 2010;10(41).
17. Collier SA, Rasmussen SA, Feldkamp ML, Honein MA. Prevalence of self-reported infection during pregnancy among control mothers in the National Birth Defects Prevention Study. *Birth Defects Res A Clin Mol Teratol* 2009;85(3):193-201.

18. Feldkamp ML, Reefhuis J, Kucik J, Krikov S, Wilson A, Moore CA, et al. Case-control study of self reported genitourinary infections and risk of gastroschisis: findings from the national birth defects prevention study, 1997-2003. *BMJ* 2008;336(7658):1386-7.
19. Li Z, Ren A, Liu J, Pei L, Zhang L, Zhanying G, et al. Maternal Flu or Fever, Medication Use, and Neural Tube Defects: A Population-Based Case-Control Study in Northern China. *Birth Defects Res A Clin Mol Teratol* 2007;79:295-300.
20. Ludvigsson JF. Effect of gastroenteritis during pregnancy on neonatal outcome. *Eur J Clin Microbiol Infect Dis* 2001;20(12):843-9.
21. Lynberg MC, Khoury MJ, Lu X, Cocian T. Maternal Flu, Fever, and the Risk of Neural Tube Defects: A Population-based Case-Control Study. *Am J Epidemiol* 1994;140:244-55.
22. Eskeland B, Baerheim A, Ulvik R, Hunskaar S. Influence of mild infections on iron status parameters in women of reproductive age. *Scandinavian Journal of Primary Health Care* 2002;20(1):50-56.
23. Tremblay E, Gregoire J-P, Moisan J. Validite d'un questionnaire autoadministre sur l'utilisation d'antibiotiques. *Can J Clin Pharmacol* 1999;6(4):203-211.
24. Rahman A, Gibney L, Person SD, Williams OD, Kiefe C, Jolly P, et al. Validity of self-reports of reasons for hospitalization by young adults and risk factors for discordance with medical records. *American Journal of Epidemiology* 2005;162(5):491-498.
25. Banhidy F, Acs N, Puho EH, Czeizel AE. Pregnancy complications and birth outcomes of pregnant women with urinary tract infections and related drug treatments. *Scand J Infect Dis* 2007;39(5):390-7.
26. Villar J, Carroli G, Wojdyla D, Abalos E, Giordano D, Ba'aqueel H, et al. Preeclampsia, gestational hypertension and intrauterine growth restriction, related or independent conditions? *Am J Obstet Gynecol* 2006;194(4):921-31.
27. Acs N, Banhidy F, Puho E, Czeizel AE. Pregnancy complications and delivery outcomes of pregnant women with influenza. *J Matern Fetal Neonatal Med* 2006;19(3):135-40.
28. Banhidy F, Acs N, Puho EH, Czeizel AE. Maternal acute respiratory infectious diseases during pregnancy and birth outcomes. *Eur J Epidemiol* 2008;23(1):29-35.
29. Banhidy F, Acs N, Puho E, Czeizel AE. Pregnancy complications and delivery outcomes of pregnant women with common cold. *Cent Eur J Public Health* 2006;14(1):10-4.
30. Dodds L, McNeil SA, Fell DB, Allen VM, Coombs A, Scott J, et al. Impact of influenza exposure on rates of hospital admissions and physician visits because of respiratory illness among pregnant women. *Cmaj* 2007;176(4):463-8.
31. Voldsgaard P, Schiffman J, Mednick S, Rodgers B, Christensen H, Bredkjaer S, et al. Accuracy of retrospective reports of infections during pregnancy. *International Journal of Methods in Psychiatric Research* 2002;11(4):184-186.
32. Laws P, Hilder L. Australia's mothers and babies 2006. *Perinatal statistics series no. 22*: AIHW National Perinatal Statistics Unit, 2008.

1  
2  
3  
4  
5  
6  
7  
8  
9  
10  
11  
12  
13  
14  
15  
16  
17  
18  
19  
20  
21  
22  
23  
24  
25  
26  
27  
28  
29  
30  
31  
32  
33  
34  
35  
36  
37  
38  
39  
40  
41  
42  
43  
44  
45  
46  
47  
48  
49  
50  
51  
52  
53  
54  
55  
56  
57  
58  
59  
60

**General symptoms for infection**

- Fever
- Night sweats / chills
- Fatigue / weakness

**Upper respiratory tract infection (e.g. A cold, influenza, tonsillitis)**

- Runny nose or blocked nose
- Sneezing
- Sore throat
- Headache, sinus/face pain
- Swollen glands

**Lower respiratory tract infection (e.g. Pneumonia, bronchitis)**

- Dry cough
- Productive cough (coughing up phlegm or mucous)
- Shortness of breath
- Chest pain
- Pain when breathing

**Urinary tract infection (e.g. Bladder or kidney infections)**

- Burning sensation when urinating
- Cloudy or foul-smelling urine
- Pus or blood in urine
- Frequent urination
- Urgency, pressure or pain in bladder

**Genital tract infection (e.g. Thrush)**

- Abnormal vaginal discharge with an unpleasant smell
- Intense itching, swelling and irritation

**Gastro-intestinal infection (e.g. Food poisoning)**

- Nausea, vomiting (other than morning sickness)
- Diarrhea
- Stomach pain

**Other infections**

- Tooth abscess
- Infected cut or scratch / Wound infection
- Skin infection / boils

207x218mm (96 x 96 DPI)

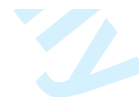

STROBE 2007 (v4) Statement—Checklist of items that should be included in reports of *cross-sectional studies*

| Section/Topic                | Item # | Recommendation                                                                                                                                                                       | Reported on page # |
|------------------------------|--------|--------------------------------------------------------------------------------------------------------------------------------------------------------------------------------------|--------------------|
| Title and abstract           | 1      | (a) Indicate the study's design with a commonly used term in the title or the abstract                                                                                               | 2                  |
|                              |        | (b) Provide in the abstract an informative and balanced summary of what was done and what was found                                                                                  | 2                  |
| <b>Introduction</b>          |        |                                                                                                                                                                                      |                    |
| Background/rationale         | 2      | Explain the scientific background and rationale for the investigation being reported                                                                                                 | 5, 6               |
| Objectives                   | 3      | State specific objectives, including any prespecified hypotheses                                                                                                                     | 6                  |
| <b>Methods</b>               |        |                                                                                                                                                                                      |                    |
| Study design                 | 4      | Present key elements of study design early in the paper                                                                                                                              | 6                  |
| Setting                      | 5      | Describe the setting, locations, and relevant dates, including periods of recruitment, exposure, follow-up, and data collection                                                      | 6                  |
| Participants                 | 6      | (a) Give the eligibility criteria, and the sources and methods of selection of participants                                                                                          | 6                  |
| Variables                    | 7      | Clearly define all outcomes, exposures, predictors, potential confounders, and effect modifiers. Give diagnostic criteria, if applicable                                             | 7                  |
| Data sources/<br>measurement | 8*     | For each variable of interest, give sources of data and details of methods of assessment (measurement). Describe comparability of assessment methods if there is more than one group | 7                  |
| Bias                         | 9      | Describe any efforts to address potential sources of bias                                                                                                                            | 7                  |
| Study size                   | 10     | Explain how the study size was arrived at                                                                                                                                            | 7                  |
| Quantitative variables       | 11     | Explain how quantitative variables were handled in the analyses. If applicable, describe which groupings were chosen and why                                                         | 7                  |
| Statistical methods          | 12     | (a) Describe all statistical methods, including those used to control for confounding                                                                                                | 7                  |
|                              |        | (b) Describe any methods used to examine subgroups and interactions                                                                                                                  | 7                  |
|                              |        | (c) Explain how missing data were addressed                                                                                                                                          | n/a                |
|                              |        | (d) If applicable, describe analytical methods taking account of sampling strategy                                                                                                   | n/a                |
|                              |        | (e) Describe any sensitivity analyses                                                                                                                                                | 7                  |
| <b>Results</b>               |        |                                                                                                                                                                                      |                    |

|                          |     |                                                                                                                                                                                                              |        |
|--------------------------|-----|--------------------------------------------------------------------------------------------------------------------------------------------------------------------------------------------------------------|--------|
| Participants             | 13* | (a) Report numbers of individuals at each stage of study—eg numbers potentially eligible, examined for eligibility, confirmed eligible, included in the study, completing follow-up, and analysed            | 8      |
|                          |     | (b) Give reasons for non-participation at each stage                                                                                                                                                         | 8      |
|                          |     | (c) Consider use of a flow diagram                                                                                                                                                                           | n/a    |
| Descriptive data         | 14* | (a) Give characteristics of study participants (eg demographic, clinical, social) and information on exposures and potential confounders                                                                     | 14     |
|                          |     | (b) Indicate number of participants with missing data for each variable of interest                                                                                                                          | 14     |
| Outcome data             | 15* | Report numbers of outcome events or summary measures                                                                                                                                                         | 16     |
| Main results             | 16  | (a) Give unadjusted estimates and, if applicable, confounder-adjusted estimates and their precision (eg, 95% confidence interval). Make clear which confounders were adjusted for and why they were included | 16, 17 |
|                          |     | (b) Report category boundaries when continuous variables were categorized                                                                                                                                    | 14, 16 |
|                          |     | (c) If relevant, consider translating estimates of relative risk into absolute risk for a meaningful time period                                                                                             | n/a    |
| Other analyses           | 17  | Report other analyses done—eg analyses of subgroups and interactions, and sensitivity analyses                                                                                                               | 16     |
| <b>Discussion</b>        |     |                                                                                                                                                                                                              |        |
| Key results              | 18  | Summarise key results with reference to study objectives                                                                                                                                                     | 10     |
| Limitations              | 19  | Discuss limitations of the study, taking into account sources of potential bias or imprecision. Discuss both direction and magnitude of any potential bias                                                   | 11     |
| Interpretation           | 20  | Give a cautious overall interpretation of results considering objectives, limitations, multiplicity of analyses, results from similar studies, and other relevant evidence                                   | 10     |
| Generalisability         | 21  | Discuss the generalisability (external validity) of the study results                                                                                                                                        | 11, 12 |
| <b>Other information</b> |     |                                                                                                                                                                                                              |        |
| Funding                  | 22  | Give the source of funding and the role of the funders for the present study and, if applicable, for the original study on which the present article is based                                                | 4      |

\*Give information separately for cases and controls in case-control studies and, if applicable, for exposed and unexposed groups in cohort and cross-sectional studies.

**Note:** An Explanation and Elaboration article discusses each checklist item and gives methodological background and published examples of transparent reporting. The STROBE checklist is best used in conjunction with this article (freely available on the Web sites of PLoS Medicine at <http://www.plosmedicine.org/>, Annals of Internal Medicine at <http://www.annals.org/>, and Epidemiology at <http://www.epidem.com/>). Information on the STROBE Initiative is available at [www.strobe-statement.org](http://www.strobe-statement.org).



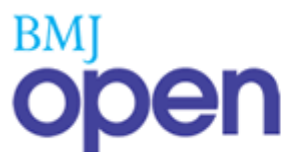

## A survey of acute self-reported infections in pregnancy

|                               |                                                                                                                                                                                                                                                                                                                                                                                                              |
|-------------------------------|--------------------------------------------------------------------------------------------------------------------------------------------------------------------------------------------------------------------------------------------------------------------------------------------------------------------------------------------------------------------------------------------------------------|
| Journal:                      | <i>BMJ Open</i>                                                                                                                                                                                                                                                                                                                                                                                              |
| Manuscript ID:                | bmjopen-2011-000083.R1                                                                                                                                                                                                                                                                                                                                                                                       |
| Article Type:                 | Research                                                                                                                                                                                                                                                                                                                                                                                                     |
| Date Submitted by the Author: | 16-Mar-2011                                                                                                                                                                                                                                                                                                                                                                                                  |
| Complete List of Authors:     | Lain, Samantha; Kolling Institute of Medical Research, Perinatal Research<br>Roberts, Christine; Kolling Institute of Medical Research, Perinatal Research<br>Warning, Julia; Kolling Institute of Medical Research, Perinatal Research<br>Vivian-Taylor, Josephine; University of Sydney, Department of Obstetrics and Gynaecology<br>Ford, Jane; Kolling Institute of Medical Research, Perinatal Research |
| <b>Subject Heading</b>:       | Obstetrics & gynaecology                                                                                                                                                                                                                                                                                                                                                                                     |
| Keywords:                     | Maternal medicine < OBSTETRICS, Prenatal diagnosis < OBSTETRICS, PERINATOLOGY, QUALITATIVE RESEARCH                                                                                                                                                                                                                                                                                                          |
|                               |                                                                                                                                                                                                                                                                                                                                                                                                              |

SCHOLARONE™  
Manuscripts

only

1  
2  
3 **A survey of acute self-reported infections in**  
4  
5 **pregnancy**  
6

Deleted: prevalence

7  
8 **Running head:** Incidence of acute infections in pregnancy  
9

Deleted: Prevalence

10 **Word count:** Main text – 2,240 words, Abstract – 192 words  
11  
12  
13  
14  
15  
16  
17  
18  
19  
20  
21  
22  
23  
24  
25  
26  
27  
28  
29  
30  
31  
32  
33  
34  
35  
36  
37  
38  
39  
40  
41  
42  
43  
44  
45  
46  
47  
48  
49  
50  
51  
52  
53  
54  
55  
56  
57  
58  
59  
60

Deleted: 113

Deleted: 190

For peer review only

## Abstract

### *Objective*

The objective of this study was to estimate the weekly incidence of self-reported infections in women at least 20 weeks pregnant.

Deleted: prevalence

Deleted: of the onset

### *Design*

We conducted a cross-sectional survey of pregnant women in a hospital antenatal clinic in Sydney Australia between August 2008 and April 2009. Women were asked to report whether they had the onset of a new infection in the seven days prior to completing the questionnaire, and were asked details of symptoms and medication taken.

Deleted: an

### *Results*

A total of 737 women at least 20 weeks pregnant completed the survey; 94% of women approached. Five per cent of the questionnaires completed reported the onset of an infection in the seven days prior to survey completion. When symptoms were analysed, 3.5% of women were classified as having a moderate or severe infection in the past seven days. The most common infection reported was a cold/upper respiratory tract infection followed by gastroenteritis. Women pregnant with their first child had a lower rate of self-reported infection than women who had other children (2.9% vs 7.2%).

### *Conclusions*

These results can be used to inform future research examining acute infection as a trigger for pregnancy complications.

**Key words:** pregnancy, infection, incidence, obstetrics, crossover studies

Deleted: prevalence

## Article summary

### Article focus

- Survey to ascertain the [incidence](#) of [new](#) infections in any seven day period during the second half of pregnancy
- Information regarding type of infection and medication taken to treat infection were also collected

Deleted: prevalence

Deleted: the onset of

### Key message:

- Five per cent of women at least 20 weeks pregnant reported the onset of a [new](#) infection in the prior seven days, 3.5% of these women had a moderate or severe infection
- Only 21% of women reporting an infection sought medical care while 65% took medication to treat the infection
- This information can be used to inform future research into acute infections as a possible trigger for pregnancy complications such as pre-eclampsia.

Deleted: n

### Strengths and limitations of this study:

- Strengths include the estimate of [incidence](#) of infection in a short-term window of time rather than at any time during pregnancy to inform research into acute triggers of pregnancy complications, and the use of information regarding symptoms and medication taken to distinguish between mild and more severe infections.
- Limitations include the use of self-reported infection however this is a tool that has previously been used to report infection in a number of populations.

Deleted: prevalence

**Funding Statement**

Samantha Lain is supported by a National Health and Medical Research Council (NHMRC) Postgraduate Scholarship (571227). Christine Roberts is supported by a National Health and Medical Research Council (NHMRC) Senior Research Fellowship. Jane Ford is supported by an NHMRC Capacity Building Grant in Population Health Research.

**Competing interests statement**

The author(s) declare that they have no competing interests.

**Authors' contributions and acknowledgements**

SJL designed and administered the survey, analysed data and drafted manuscript.

CLR and JBF developed the study and helped design survey. CLR, JBF, JVT and JW contributed to data analysis and interpretation. All authors edited the manuscript and gave final approval of the version to be published.

We wish to acknowledge the help of research midwives Kristen Rickard, Jill Milligan and Jocelyn Segley with administering surveys in the antenatal clinic.

## Background

Acute infections during pregnancy are associated with adverse outcomes including miscarriage, preterm prelabour rupture of membranes, preterm birth and stillbirth<sup>1-3</sup>.

Epidemiological evidence suggests that maternal infections may precipitate other complications of pregnancy including preeclampsia<sup>4</sup>. Early pregnancy evokes a mild and limited systemic inflammatory response with increased levels of pro-

inflammatory mediators such as prostaglandin E<sub>2</sub> (PGE<sub>2</sub>), tumor necrosis factor (TNF)- $\alpha$ <sup>5</sup>, interleukins 1 and 6.<sup>6,7</sup> These inflammatory mediators promote vascular remodelling and placental invasion, necessary in early pregnancy to ensure adequate fetal growth. The placenta reaches its full size by about 20 weeks, by which time,

vascular remodelling is complete and a concurrent decrease in circulating inflammatory markers has been observed.<sup>8-10</sup> In clinically normal pregnancies, maternal inflammation remains subdued until the onset of labour, when PGE<sub>2</sub> and proinflammatory cytokines mediate the ripening of the cervix, rupture of membranes, and myometrial contractility.<sup>11,12</sup> Therefore, acute infection may trigger perturbations in the temporal control of maternal inflammation, causing adverse pregnancy outcomes.<sup>13,14</sup> The maternal immune response to such an infection could mimic the cytokine milieu involved in the onset of labour.

Previous studies in pregnancy have centred on specific infections such as urinary tract infection and periodontal disease rather than investigating incidence of all acute infections which may evoke an inflammatory response. Acute infectious episodes are known to increase the risk of cardiovascular diseases (CVD) including the risk of first-time myocardial infarction and stroke. Studies of these diseases suggest the effect of infection may be generic and not linked to specific types of infection.<sup>15</sup> The current

Deleted: prevalence

1  
2 study arose out of the design phase of a similar study among pregnant women, to  
3  
4 investigate the possible role of infection and other acute triggers in the onset of  
5  
6 preeclampsia, an acute hypertensive disorder of pregnancy. An accurate estimate of  
7  
8 the incidence rate of infections during the second half of pregnancy (when women are  
9  
10 at risk of preeclampsia) is necessary to calculate the study sample size; a simple  
11  
12 overall infection rate will not suffice when assessing acute triggers. Few studies have  
13  
14 assessed the incidence of acute infections during pregnancy and none have addressed  
15  
16 the specific issue of timing during pregnancy<sup>4</sup>. Use of 'infection at any time during  
17  
18 during pregnancy' may result in systematic misclassification of exposure and dilution  
19  
20 of the true risk of complications occurring later in pregnancy. The aim of this current  
21  
22 study is to ascertain the incidence of acute infections in any seven day period during  
23  
24 the second half of pregnancy.  
25

Deleted: prevalence

Deleted: prevalence

Deleted: prevalence

Deleted: the onset of

## 26 27 28 **Methods**

29  
30 This cross-sectional study was conducted in the antenatal clinic of a teaching hospital  
31  
32 with tertiary obstetric and neonatal care facilities in Sydney, Australia between  
33  
34 August 2008 and April 2009. Methods have been described in detail previously in a  
35  
36 separate report of recent activities during pregnancy<sup>16</sup>. Briefly, women who were at  
37  
38 least 20 weeks pregnant and able to complete the questionnaire in English were  
39  
40 eligible. Women were approached in the antenatal clinic by a trained researcher not  
41  
42 involved in their medical care and completed a short questionnaire after giving  
43  
44 informed consent. The questionnaire was developed from a review of literature and  
45  
46 discussion with clinical staff and was piloted prior to study commencement.  
47  
48  
49

Deleted: e

50 The questionnaire asked women about demographic characteristics and whether they  
51  
52 had an infection during their pregnancy. Other studies have similarly identified recent  
53  
54  
55  
56  
57  
58  
59  
60

1  
2  
3  
4  
5  
6  
7  
8  
9  
10  
11  
12  
13  
14  
15  
16  
17  
18  
19  
20  
21  
22  
23  
24  
25  
26  
27  
28  
29  
30  
31  
32  
33  
34  
35  
36  
37  
38  
39  
40  
41  
42  
43  
44  
45  
46  
47  
48  
49  
50  
51  
52  
53  
54  
55  
56  
57  
58  
59  
60

infections using self-report<sup>17-21</sup> and concordance studies find this to be reliable<sup>22-25</sup>. [In the questionnaire, infection was defined as “symptoms lasting more than 24 hours that you think were caused by an infection” and onset of the most recent infection was identified as in the last 7, 8-14 or >14 days. Detailed information was only asked for the new infections in the last 7 days.](#) Participants were also prompted with a list of examples such as a cold or flu, urinary tract infection, thrush, tooth abscess or an infected wound when considering if they had an infection in the past seven days. The questionnaire sought information about infection in the seven days prior to its completion, so women were eligible to complete the survey more than once, providing there was at least fourteen days between each questionnaire. If the women responded that they had an infection in the last 7 days they were asked to record perceived severity (mild, moderate or severe) of symptoms from a provided list (see Figure 1). Details were also collected regarding medical advice sought, tests received and medication taken for their infection. Details of symptoms and medication were used to analyse severity of infections. Women who had taken antibiotics or had three or more symptoms that they rated as moderate or severe were classified as having a ‘moderate/severe’ infection. As the timing of the onset of infection was important, women were given a calendar to help prompt them with the date of onset of infection and were also asked how confident they were of the date the infection first appeared.

Deleted:

Survey data were analysed using frequency tabulations and contingency table analyses. Stratified analysis, using chi square tests, examined the impact of gestational age, parity, plurality, maternal education and other medical conditions on the [incidence](#) of infection. This study was approved by the Northern Sydney and Central Coast Human Research Ethics Committee.

Deleted: prevalence



## Results

Among women who were at least 20 weeks pregnant approached to complete the survey, 738 (94%) agreed to participate; 97% when approached for the first time and 87% when approached to complete the survey for a subsequent time. A total of 737 surveys were completed, including 161 women completed the survey more than once.

The significant differences between women completing the survey more than once and those who only completed one survey were increased gestational age, women with multiple pregnancies and women with university degrees<sup>16</sup>. The majority of the women that completed the survey were over 30 years of age, had a University degree, and were having their first baby (see Table 1).

Forty per cent of women surveyed said that they had had an infection at some stage during their pregnancy. Five per cent of the surveys completed reported the onset of an infection in the seven days prior to survey completion (see Table 2) and 5.7% reported the onset of an infection 7 to 14 days before completing survey. For women who reported an infection in the seven days prior to completing the survey, the most common infection was a cold/upper respiratory tract infection with an incidence rate of 2.6%, followed by gastroenteritis or vomiting (0.7%), influenza (0.5%), candidiasis (0.4%) and urinary tract infection (0.4%). When only 'moderate/severe' infections were examined, the weekly incidence of any new infection decreased to 3.5% and the incidence of a cold/upper respiratory tract infection in the seven days prior to survey completion decreased to 1.2%.

Table 2 shows the weekly incidence of infections by demographic and pregnancy variables. The incidence of infection differed significantly by parity, plurality and for

Deleted: only

Deleted: was

Formatted: Superscript

Deleted: prevalence

Deleted: prevalence

Deleted: of the onset of

Deleted: prevalence

Deleted: of the onset

Deleted: prevalence

Deleted: the onset of

Deleted: prevalence

Deleted: onset of

1  
2 women who had high blood pressure. Less women who were pregnant for the first  
3 time reported the onset of an infection compared to women who were pregnant for a  
4 second or subsequent time (2.9% vs 7.2%,  $p = 0.008$ ). Women who were pregnant  
5  
6 with twins reported a higher incidence of infection than women pregnant with a  
7  
8 singleton (16.1% vs 4.5%,  $p = 0.004$ ), however there was no difference between  
9  
10 groups in the incidence of moderate/severe infection. Women that reported having a  
11  
12 hypertensive disorder of pregnancy reported more infection than women without a  
13  
14 medical condition (15.3% vs 4.6%,  $p = 0.01$ ).  
15  
16  
17  
18  
19  
20

Deleted: prevalence

Deleted: prevalence

21 Of those women reporting an infection in the seven days prior to survey completion,  
22 the proportion who sought medical advice or took medication are outlined in Table 3.  
23  
24 Twenty one per cent of women with an infection saw a health care professional and  
25  
26 65% took some type of medication to treat the infection. Most commonly  
27  
28 paracetamol /acetaminophen was taken, followed by antibiotics and 5% of women  
29  
30 with an infection reported taking aspirin. Just over 50% of women reporting an  
31  
32 infection stated that they had a fever and a third of these women reported having their  
33  
34 temperature taken. The two women that reported having an investigative test  
35  
36 performed had urine samples taken for urinary tract infections. The highest incidence  
37  
38 of infection in the seven days prior to the survey was in the southern hemisphere  
39  
40 winter month of August (11.5%) while January (summer) had the lowest infection  
41  
42 rate (0.6%). Most women (92%) were confident or very confident of the date when  
43  
44 symptoms of infection first appeared.  
45  
46  
47

Deleted: rates of onset of any

Deleted: ere

## 48 Discussion

49 This is the first study to look at the incidence of infection in a seven day window in  
50  
51 pregnant women. There are a number of studies that report the rate of selected  
52  
53  
54  
55  
56  
57  
58  
59  
60

Deleted: prevalence

Deleted: prevalence

1  
2  
3 infections at any time during pregnancy and it is necessary to estimate weekly rates  
4  
5 for comparison to these studies, assuming a constant rate of infection by week of  
6  
7 gestation. Our study found a lower rate of self-reported infection during the whole  
8  
9 pregnancy (40%) than Collier *et al*<sup>17</sup> (64%) however they included first trimester.

Deleted: s

Deleted: prevalence

10 Weekly rates for specific infections in pregnancy reported in other studies include:  
11  
12 urinary tract infection 0.2% to 0.5%<sup>17,26,27</sup> (similar to 0.4% reported in our study),  
13  
14 gastroenteritis 0.8%<sup>20</sup> (0.7% in this study), influenza 0.1%<sup>27</sup> (0.5% in this study),  
15  
16 acute respiratory infectious disease 0.2%<sup>28</sup> and the common cold 0.4%<sup>29</sup> (compared to  
17  
18 1.2% of moderate/severe upper respiratory tract infections reported in this study).

Deleted: prevalence

19  
20 Our study has a higher incidence rate for the common cold however a population-  
21  
22 based cohort study in Canada found the weekly rate of acute respiratory illness severe  
23  
24 enough to require a physician visit ranged from 1.1% to 1.9%<sup>30</sup>, similar to the

Deleted: prevalence

25  
26 incidence rate of severe colds observed in this study. As each completed  
27  
28 questionnaire was anonymous, we could not determine whether any of the infections  
29  
30 were recurrent and it is possible that some of the reported infections were chronic  
31  
32 rather than acute.

Deleted: prevalence

Deleted: of the onset

33  
34  
35 We found the incidence of acute infections was higher for women who had previously  
36  
37 been pregnant and, for mild infections, women with twin pregnancies. Children are  
38  
39 prone to developing infections<sup>20</sup> which could be easily transferred to the mother.

40  
41  
42 Women pregnant with multi-fetal pregnancies may have increased antenatal visits and  
43  
44 surveillance by clinicians, and this may lead to an increase in the reporting of  
45  
46 infections. An unexpected yet interesting finding from the survey was the increased  
47  
48 incidence of infection in women with a hypertensive disorder of pregnancy, although  
49  
50 this rate is based on small numbers and the confidence intervals around the incidence  
51  
52

Deleted: prevalence

Deleted: prevalence

1  
2 estimate are very wide. This result is of particular interest because the estimate of  
3  
4 incidence of infection in pregnant women from this survey is to inform future  
5  
6 research about infection and preeclampsia. The authors propose using the incidence  
7  
8 estimates of infection obtained from the current study for a case-crossover study  
9  
10 investigating the role of acute infection and other acute triggers in the onset of  
11  
12 preeclampsia. The current study however was not designed to examine infection rates  
13  
14 in pregnant women with hypertension. In this cross-sectional survey it was not  
15  
16 possible to establish whether the hypertension or the infection occurred first.  
17

Deleted: prevalence

Deleted: prevalence

18  
19  
20 The reliance upon self-report of infection is a potential limitation of the study with  
21  
22 only 21% of women reporting an infection seeking medical attention, however mild  
23  
24 infections that do not come to medical attention may still be a risk for pregnancy  
25  
26 complications<sup>17</sup>. Self-report of infection has been used to estimate the rates of  
27  
28 gastroenteritis<sup>20</sup>, influenza and fever<sup>19 21</sup>, and genitourinary infections<sup>18</sup> in pregnant  
29  
30 women. Banhidy *et al* collected information about infection both from prospectively  
31  
32 collected medical data and self-report from women in a post-natal questionnaire<sup>25 28</sup>.  
33  
34 They found that 74% of women reporting an acute respiratory disease during  
35  
36 pregnancy had the disease recorded in their medical records<sup>28</sup> and 95% of women  
37  
38 with a medically recorded urinary tract infection self-reported the infection<sup>25</sup>. Our  
39  
40 study also collected information about severity of symptoms experienced and  
41  
42 medication taken which helped to distinguish between mild and more severe  
43  
44 infections. This stratified analysis of reported infections increases the certainty that  
45  
46 women who experienced a severe infection truly did have an infection.  
47  
48  
49  
50  
51  
52  
53  
54  
55  
56  
57  
58  
59  
60

Deleted: prevalence

1  
2  
3 The use of self reported data may be affected by recall bias. One study using self-  
4 report of any infection during pregnancy recommended ‘future studies should  
5 emphasize the importance of interviewing women as early as possible’<sup>17</sup> as mother’s  
6 tend to under-report infection when recalling information after birth<sup>31</sup>. The short  
7 window of time to recall details of infection in our study (seven days) minimises this  
8 recall bias.  
9  
10  
11  
12

13  
14  
15  
16 A further limitation of this study is that the study population is older than the general  
17 population of pregnant women in Australia<sup>26</sup>, is highly educated and was restricted to  
18 English speaking participants. Although this may impact the generalisability of the  
19 results, such characteristics are representative of the women that attend this hospital.  
20  
21  
22

23  
24 Notably age or education level did not have a significant effect on the total infection  
25 rate, although a larger sample size may show an association between these factors and  
26 sexually transmitted infections. Strengths of this paper include the investigation of  
27 any infection rather than being limited to single infections; and the investigation of  
28 acute rather than chronic infections which may be over-estimated if weekly incidence  
29 rates rather than date of infection onset are used.  
30  
31  
32  
33  
34  
35  
36

Deleted: s

Deleted: longer-term

Deleted: prevalence

### 37 Conclusions

38  
39 This survey is the first study to estimate the weekly incidence of acute infections in a  
40 population of pregnant women. The results of this study will be used to inform future  
41 research examining the association between acute infection and pregnancy  
42 complications such as preeclampsia. This study also informs clinicians about the  
43 types of infections and medications pregnant women are exposed to.  
44  
45  
46  
47  
48  
49  
50  
51  
52  
53  
54  
55  
56  
57  
58  
59  
60

Deleted: prevalence

Table 1: The characteristics of women surveyed

|                                                               | N (%)      |
|---------------------------------------------------------------|------------|
| <b>All surveys completed</b>                                  | 737        |
| Women that have completed survey only once                    | 576 (78.2) |
| <b>Maternal age</b>                                           |            |
| < 25 years                                                    | 55 (7.5)   |
| 25 – 34 years                                                 | 430 (58.3) |
| ≥ 35 years                                                    | 247 (33.5) |
| <b>Gestational age</b>                                        |            |
| 20 – 28 weeks                                                 | 241 (32.7) |
| 29 – 34 weeks                                                 | 172 (23.3) |
| 35 – 42 weeks                                                 | 324 (44.0) |
| <b>Plurality</b>                                              |            |
| Singleton                                                     | 705 (95.7) |
| Twins/Triplets                                                | 31 (4.2)   |
| <b>Parity</b>                                                 |            |
| Nulliparous                                                   | 376 (51.0) |
| Multiparous                                                   | 360 (48.8) |
| <b>Highest level of education completed</b>                   |            |
| Without University degree                                     | 313 (42.5) |
| With University degree                                        | 422 (57.3) |
| <b>Medical conditions (pre-existing or pregnancy related)</b> |            |

|    |                       |            |
|----|-----------------------|------------|
| 1  |                       |            |
| 2  |                       |            |
| 3  | No medical conditions | 564 (76.5) |
| 4  |                       |            |
| 5  | Asthma                | 69 (9.4)   |
| 6  |                       |            |
| 7  | High blood pressure   | 25 (3.4)   |
| 8  |                       |            |
| 9  | Diabetes              | 46 (6.2)   |
| 10 |                       |            |
| 11 | Other                 | 32 (4.3)   |

**Smoking status**

|    |                                    |            |
|----|------------------------------------|------------|
| 12 |                                    |            |
| 13 |                                    |            |
| 14 | Did not smoke during pregnancy     | 708 (96.1) |
| 15 |                                    |            |
| 16 | Smoked cigarettes during pregnancy | 29 (3.9)   |
| 17 |                                    |            |
| 18 | <hr/>                              |            |

For peer review only

Table 2: The characteristics of women without and without a self-reported infection, and the weekly [incidence](#) rate, per 100 surveys, of infection in the seven days prior to completing the survey

Deleted: prevalence

Deleted: prevalence

|                                             | Women with self-reported infection | Weekly <a href="#">incidence</a> of self-reported infection |
|---------------------------------------------|------------------------------------|-------------------------------------------------------------|
|                                             | N                                  | % (95% CI)                                                  |
| <b>All surveys completed</b>                | 37                                 | 5.0 [3.4 – 6.6]                                             |
| Women that have completed survey only once  | 28                                 | 4.8 [3.1 – 6.6]                                             |
| <b>Maternal age</b>                         |                                    |                                                             |
| < 25 years                                  | 3                                  | 5.5 [0.0 – 10.7]                                            |
| 25 – 34 years                               | 18                                 | 4.2 [2.3 – 6.1]                                             |
| ≥ 35 years                                  | 16                                 | 6.5 [3.4 – 9.6]                                             |
| <b>Gestational age</b>                      |                                    |                                                             |
| 20 – 28 weeks                               | 10                                 | 4.2 [1.6 – 6.7]                                             |
| 29 – 34 weeks                               | 9                                  | 5.2 [1.9 – 8.6]                                             |
| 35 – 42 weeks                               | 18                                 | 5.6 [3.0 – 8.1]                                             |
| <b>Plurality</b>                            |                                    |                                                             |
| Singleton                                   | 32                                 | 4.5 [3.0 – 6.1]                                             |
| Twins/Triplets                              | 5                                  | 16.1 [2.4 – 29.8]                                           |
| <b>Parity</b>                               |                                    |                                                             |
| Nulliparous                                 | 11                                 | 2.9 [1.2 – 4.6]                                             |
| Multiparous                                 | 26                                 | 7.2 [4.5 – 9.9]                                             |
| <b>Highest level of education completed</b> |                                    |                                                             |



|                           |    |                 |
|---------------------------|----|-----------------|
| Without University degree | 14 | 4.5 [2.2 – 6.8] |
| With University degree    | 23 | 5.5 [3.3 – 7.6] |

**Medical conditions (pre-existing  
or pregnancy related)**

|                       |    |                   |
|-----------------------|----|-------------------|
| No medical conditions | 26 | 4.6 [2.9 – 6.3]   |
| Asthma                | 4  | 5.8 [0.1 – 11.5]  |
| High blood pressure   | 4  | 15.3 [0.5 – 30.2] |
| Diabetes              | 3  | 6.5 [0.0 – 13.9]  |
| Other                 | 0  | 0.0               |

**Smoking status**

|                                    |    |                  |
|------------------------------------|----|------------------|
| Did not smoke during pregnancy     | 36 | 5.1, [3.5 – 6.7] |
| Smoked cigarettes during pregnancy | 1  | 3., [0.0 – 10.5] |

---

1  
2 Table 3. Medication taken or health advice sought by women with self-reported  
3  
4 infection  
5

|                                      | N  | %     |
|--------------------------------------|----|-------|
|                                      | 37 |       |
| <i>Medication taken</i>              |    |       |
| Paracetamol /acetaminophen           | 12 | 32.4% |
| Aspirin                              | 2  | 5.4%  |
| Antibiotics                          | 7  | 18.9% |
| None                                 | 3  | 8.1%  |
| Other*                               | 13 | 35.1% |
| <i>Medical Care</i>                  |    |       |
| Advice sought from doctor            | 8  | 21.6% |
| Medical test/investigation performed | 2  | 5.4%  |
| Temperature taken                    | 7  | 18.9% |

\*Includes antifungal cream, antibacterial throat lozenges and gargle

1  
2  
3 Figure 1. List of symptoms that participants who reported having an infection were  
4 asked about details of severity (none, mild, moderate or severe)  
5  
6  
7

8 See attached file  
9  
10  
11  
12  
13  
14  
15  
16  
17  
18  
19  
20  
21  
22  
23  
24  
25  
26  
27  
28  
29  
30  
31  
32  
33  
34  
35  
36  
37  
38  
39  
40  
41  
42  
43  
44  
45  
46  
47  
48  
49  
50  
51  
52  
53  
54  
55  
56  
57  
58  
59  
60

For peer review only

1. Brocklehurst P. Infection and preterm delivery. *BMJ* 1999;318(7183):548-9.
2. Goldenberg RL, Hauth JC, Andrews WW. Intrauterine infection and preterm delivery. *N Engl J Med* 2000;342(20):1500-7.
3. Goldenberg RL, McClure EM, Saleem S, Reddy UM. Infection-related stillbirths. *Lancet* 2010;375(9724):1482-90.
4. Conde-Agudelo A, Villar J, Lindheimer M. Maternal infection and risk of preeclampsia: systematic review and metaanalysis. *Am J Obstet Gynecol* 2008;198(1):7-22.
5. Kupfermanc MJ, Peaceman AM, Wigton TR, Tamura RK, Rehnberg KA, Socol ML. Immunoreactive tumor necrosis factor-alpha is elevated in maternal plasma but undetected in amniotic fluid in the second trimester. *Am J Obstet Gynecol* 1994;171(4):976-9.
6. Rustveld LO, Kelsey SF, Sharma R. Association between maternal infections and preeclampsia: a systematic review of epidemiologic studies. *Matern Child Health J* 2008;12(2):223-42.
7. Gabay C, Kushner I. Acute-phase proteins and other systemic responses to inflammation. *N Engl J Med* 1999;340(6):448-54.
8. Elenkov IJ, Wilder RL, Bakalov VK, Link AA, Dimitrov MA, Fisher S, et al. IL-12, TNF-alpha, and hormonal changes during late pregnancy and early postpartum: implications for autoimmune disease activity during these times. *J Clin Endocrinol Metab* 2001;86(10):4933-8.
9. Luppi P, Haluszczak C, Betters D, Richard CA, Trucco M, DeLoia JA. Monocytes are progressively activated in the circulation of pregnant women. *J Leukoc Biol* 2002;72(5):874-84.
10. McCracken SA, Hadfield K, Rahimi Z, Gallery ED, Morris JM. NF-kappaB-regulated suppression of T-bet in T cells represses Th1 immune responses in pregnancy. *Eur J Immunol* 2007;37(5):1386-96.
11. Romero R, Munoz H, Gomez R, Parra M, Polanco M, Valverde V, et al. Increase in prostaglandin bioavailability precedes the onset of human parturition. *Prostaglandins Leukot Essent Fatty Acids* 1996;54(3):187-91.
12. Yuan M, Jordan F, McInnes IB, Harnett MM, Norman JE. Leukocytes are primed in peripheral blood for activation during term and preterm labour. *Mol Hum Reprod* 2009;15(11):713-24.
13. Redman CW, Sargent IL. Latest advances in understanding preeclampsia. *Science* 2005;308(5728):1592-4.
14. von Dadelszen P, Magee LA. Could an infectious trigger explain the differential maternal response to the shared placental pathology of preeclampsia and normotensive intrauterine growth restriction? *Acta Obstet Gynecol Scand* 2002;81(7):642-648.
15. Smeeth L, Thomas SL, Hall AJ, Hubbard R, Farrington P, Vallance P. Risk of myocardial infarction and stroke after acute infection or vaccination. *N Engl J Med* 2004;351(25):2611-8.
16. Lain SJ, Ford JB, Hadfield RM, Roberts CL. A prevalence survey of every-day activities in pregnancy. *BMC Pregnancy and Childbirth* 2010;10(41).
17. Collier SA, Rasmussen SA, Feldkamp ML, Honein MA. Prevalence of self-reported infection during pregnancy among control mothers in the National Birth Defects Prevention Study. *Birth Defects Res A Clin Mol Teratol* 2009;85(3):193-201.

18. Feldkamp ML, Reefhuis J, Kucik J, Krikov S, Wilson A, Moore CA, et al. Case-control study of self reported genitourinary infections and risk of gastroschisis: findings from the national birth defects prevention study, 1997-2003. *BMJ* 2008;336(7658):1386-7.
19. Li Z, Ren A, Liu J, Pei L, Zhang L, Zhanying G, et al. Maternal Flu or Fever, Medication Use, and Neural Tube Defects: A Population-Based Case-Control Study in Northern China. *Birth Defects Res A Clin Mol Teratol* 2007;79:295-300.
20. Ludvigsson JF. Effect of gastroenteritis during pregnancy on neonatal outcome. *Eur J Clin Microbiol Infect Dis* 2001;20(12):843-9.
21. Lynberg MC, Khoury MJ, Lu X, Cocian T. Maternal Flu, Fever, and the Risk of Neural Tube Defects: A Population-based Case-Control Study. *Am J Epidemiol* 1994;140:244-55.
22. Eskeland B, Baerheim A, Ulvik R, Hunnskaar S. Influence of mild infections on iron status parameters in women of reproductive age. *Scandinavian Journal of Primary Health Care* 2002;20(1):50-56.
23. Tremblay E, Gregoire J-P, Moisan J. Validite d'un questionnaire autoadministre sur l'utilisation d'antibiotiques. *Can J Clin Pharmacol* 1999;6(4):203-211.
24. Rahman A, Gibney L, Person SD, Williams OD, Kiefe C, Jolly P, et al. Validity of self-reports of reasons for hospitalization by young adults and risk factors for discordance with medical records. *American Journal of Epidemiology* 2005;162(5):491-498.
25. Banhidy F, Acs N, Puho EH, Czeizel AE. Pregnancy complications and birth outcomes of pregnant women with urinary tract infections and related drug treatments. *Scand J Infect Dis* 2007;39(5):390-7.
26. Villar J, Carroli G, Wojdyla D, Abalos E, Giordano D, Ba'aqeel H, et al. Preeclampsia, gestational hypertension and intrauterine growth restriction, related or independent conditions? *Am J Obstet Gynecol* 2006;194(4):921-31.
27. Acs N, Banhidy F, Puho E, Czeizel AE. Pregnancy complications and delivery outcomes of pregnant women with influenza. *J Matern Fetal Neonatal Med* 2006;19(3):135-40.
28. Banhidy F, Acs N, Puho EH, Czeizel AE. Maternal acute respiratory infectious diseases during pregnancy and birth outcomes. *Eur J Epidemiol* 2008;23(1):29-35.
29. Banhidy F, Acs N, Puho E, Czeizel AE. Pregnancy complications and delivery outcomes of pregnant women with common cold. *Cent Eur J Public Health* 2006;14(1):10-4.
30. Dodds L, McNeil SA, Fell DB, Allen VM, Coombs A, Scott J, et al. Impact of influenza exposure on rates of hospital admissions and physician visits because of respiratory illness among pregnant women. *Cmaj* 2007;176(4):463-8.
31. Voldsgaard P, Schiffman J, Mednick S, Rodgers B, Christensen H, Bredkjaer S, et al. Accuracy of retrospective reports of infections during pregnancy. *International Journal of Methods in Psychiatric Research* 2002;11(4):184-186.
32. Laws P, Hilder L. Australia's mothers and babies 2006. *Perinatal statistics series no. 22*: AIHW National Perinatal Statistics Unit, 2008.

**General symptoms for infection**

- Fever
- Night sweats / chills
- Fatigue / weakness

**Upper respiratory tract infection (e.g. A cold, influenza, tonsillitis)**

- Runny nose or blocked nose
- Sneezing
- Sore throat
- Headache, sinus/face pain
- Swollen glands

**Lower respiratory tract infection (e.g. Pneumonia, bronchitis)**

- Dry cough
- Productive cough (coughing up phlegm or mucous)
- Shortness of breath
- Chest pain
- Pain when breathing

**Urinary tract infection (e.g. Bladder or kidney infections)**

- Burning sensation when urinating
- Cloudy or foul-smelling urine
- Pus or blood in urine
- Frequent urination
- Urgency, pressure or pain in bladder

**Genital tract infection (e.g. Thrush)**

- Abnormal vaginal discharge with an unpleasant smell
- Intense itching, swelling and irritation

**Gastro-intestinal infection (e.g. Food poisoning)**

- Nausea, vomiting (other than morning sickness)
- Diarrhea
- Stomach pain

**Other infections**

- Tooth abscess
- Infected cut or scratch / Wound infection
- Skin infection / boils

207x218mm (96 x 96 DPI)

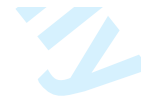

STROBE 2007 (v4) Statement—Checklist of items that should be included in reports of *cross-sectional studies*

| Section/Topic                | Item # | Recommendation                                                                                                                                                                       | Reported on page # |
|------------------------------|--------|--------------------------------------------------------------------------------------------------------------------------------------------------------------------------------------|--------------------|
| Title and abstract           | 1      | (a) Indicate the study's design with a commonly used term in the title or the abstract                                                                                               | 2                  |
|                              |        | (b) Provide in the abstract an informative and balanced summary of what was done and what was found                                                                                  | 2                  |
| <b>Introduction</b>          |        |                                                                                                                                                                                      |                    |
| Background/rationale         | 2      | Explain the scientific background and rationale for the investigation being reported                                                                                                 | 5, 6               |
| Objectives                   | 3      | State specific objectives, including any prespecified hypotheses                                                                                                                     | 6                  |
| <b>Methods</b>               |        |                                                                                                                                                                                      |                    |
| Study design                 | 4      | Present key elements of study design early in the paper                                                                                                                              | 6                  |
| Setting                      | 5      | Describe the setting, locations, and relevant dates, including periods of recruitment, exposure, follow-up, and data collection                                                      | 6                  |
| Participants                 | 6      | (a) Give the eligibility criteria, and the sources and methods of selection of participants                                                                                          | 6                  |
| Variables                    | 7      | Clearly define all outcomes, exposures, predictors, potential confounders, and effect modifiers. Give diagnostic criteria, if applicable                                             | 7                  |
| Data sources/<br>measurement | 8*     | For each variable of interest, give sources of data and details of methods of assessment (measurement). Describe comparability of assessment methods if there is more than one group | 7                  |
| Bias                         | 9      | Describe any efforts to address potential sources of bias                                                                                                                            | 7                  |
| Study size                   | 10     | Explain how the study size was arrived at                                                                                                                                            | 7                  |
| Quantitative variables       | 11     | Explain how quantitative variables were handled in the analyses. If applicable, describe which groupings were chosen and why                                                         | 7                  |
| Statistical methods          | 12     | (a) Describe all statistical methods, including those used to control for confounding                                                                                                | 7                  |
|                              |        | (b) Describe any methods used to examine subgroups and interactions                                                                                                                  | 7                  |
|                              |        | (c) Explain how missing data were addressed                                                                                                                                          | n/a                |
|                              |        | (d) If applicable, describe analytical methods taking account of sampling strategy                                                                                                   | n/a                |
|                              |        | (e) Describe any sensitivity analyses                                                                                                                                                | 7                  |
| <b>Results</b>               |        |                                                                                                                                                                                      |                    |

|                          |     |                                                                                                                                                                                                              |        |
|--------------------------|-----|--------------------------------------------------------------------------------------------------------------------------------------------------------------------------------------------------------------|--------|
| Participants             | 13* | (a) Report numbers of individuals at each stage of study—eg numbers potentially eligible, examined for eligibility, confirmed eligible, included in the study, completing follow-up, and analysed            | 8      |
|                          |     | (b) Give reasons for non-participation at each stage                                                                                                                                                         | 8      |
|                          |     | (c) Consider use of a flow diagram                                                                                                                                                                           | n/a    |
| Descriptive data         | 14* | (a) Give characteristics of study participants (eg demographic, clinical, social) and information on exposures and potential confounders                                                                     | 14     |
|                          |     | (b) Indicate number of participants with missing data for each variable of interest                                                                                                                          | 14     |
| Outcome data             | 15* | Report numbers of outcome events or summary measures                                                                                                                                                         | 16     |
| Main results             | 16  | (a) Give unadjusted estimates and, if applicable, confounder-adjusted estimates and their precision (eg, 95% confidence interval). Make clear which confounders were adjusted for and why they were included | 16, 17 |
|                          |     | (b) Report category boundaries when continuous variables were categorized                                                                                                                                    | 14, 16 |
|                          |     | (c) If relevant, consider translating estimates of relative risk into absolute risk for a meaningful time period                                                                                             | n/a    |
| Other analyses           | 17  | Report other analyses done—eg analyses of subgroups and interactions, and sensitivity analyses                                                                                                               | 16     |
| <b>Discussion</b>        |     |                                                                                                                                                                                                              |        |
| Key results              | 18  | Summarise key results with reference to study objectives                                                                                                                                                     | 10     |
| Limitations              | 19  | Discuss limitations of the study, taking into account sources of potential bias or imprecision. Discuss both direction and magnitude of any potential bias                                                   | 11     |
| Interpretation           | 20  | Give a cautious overall interpretation of results considering objectives, limitations, multiplicity of analyses, results from similar studies, and other relevant evidence                                   | 10     |
| Generalisability         | 21  | Discuss the generalisability (external validity) of the study results                                                                                                                                        | 11, 12 |
| <b>Other information</b> |     |                                                                                                                                                                                                              |        |
| Funding                  | 22  | Give the source of funding and the role of the funders for the present study and, if applicable, for the original study on which the present article is based                                                | 4      |

\*Give information separately for cases and controls in case-control studies and, if applicable, for exposed and unexposed groups in cohort and cross-sectional studies.

**Note:** An Explanation and Elaboration article discusses each checklist item and gives methodological background and published examples of transparent reporting. The STROBE checklist is best used in conjunction with this article (freely available on the Web sites of PLoS Medicine at <http://www.plosmedicine.org/>, Annals of Internal Medicine at <http://www.annals.org/>, and Epidemiology at <http://www.epidem.com/>). Information on the STROBE Initiative is available at [www.strobe-statement.org](http://www.strobe-statement.org).





## A survey of acute self-reported infections in pregnancy

|                               |                                                                                                                                                                                                                                                                                                                                                                                                              |
|-------------------------------|--------------------------------------------------------------------------------------------------------------------------------------------------------------------------------------------------------------------------------------------------------------------------------------------------------------------------------------------------------------------------------------------------------------|
| Journal:                      | <i>BMJ Open</i>                                                                                                                                                                                                                                                                                                                                                                                              |
| Manuscript ID:                | bmjopen-2011-000083.R2                                                                                                                                                                                                                                                                                                                                                                                       |
| Article Type:                 | Research                                                                                                                                                                                                                                                                                                                                                                                                     |
| Date Submitted by the Author: | 08-Apr-2011                                                                                                                                                                                                                                                                                                                                                                                                  |
| Complete List of Authors:     | Lain, Samantha; Kolling Institute of Medical Research, Perinatal Research<br>Roberts, Christine; Kolling Institute of Medical Research, Perinatal Research<br>Warning, Julia; Kolling Institute of Medical Research, Perinatal Research<br>Vivian-Taylor, Josephine; University of Sydney, Department of Obstetrics and Gynaecology<br>Ford, Jane; Kolling Institute of Medical Research, Perinatal Research |
| <b>Subject Heading</b>:       | Obstetrics & gynaecology                                                                                                                                                                                                                                                                                                                                                                                     |
| Keywords:                     | Maternal medicine < OBSTETRICS, Prenatal diagnosis < OBSTETRICS, PERINATOLOGY, QUALITATIVE RESEARCH                                                                                                                                                                                                                                                                                                          |
|                               |                                                                                                                                                                                                                                                                                                                                                                                                              |

SCHOLARONE™  
Manuscripts

only

# A survey of acute self-reported infections in pregnancy

Running head: Prevalence of acute infections in pregnancy

Word count: Main text – 2,246 words, Abstract – 193 words

Deleted: Incidence

Deleted: 240

Deleted: 192

For peer review only

1  
2  
3  
4  
5  
6  
7  
8  
9  
10  
11  
12  
13  
14  
15  
16  
17  
18  
19  
20  
21  
22  
23  
24  
25  
26  
27  
28  
29  
30  
31  
32  
33  
34  
35  
36  
37  
38  
39  
40  
41  
42  
43  
44  
45  
46  
47  
48  
49  
50  
51  
52  
53  
54  
55  
56  
57  
58  
59  
60

## Abstract

### *Objective*

The objective of this study was to estimate the weekly prevalence of self-reported recently-acquired infections in women at least 20 weeks pregnant.

Deleted: incidence

### *Design*

We conducted a cross-sectional survey of pregnant women in a hospital antenatal clinic in Sydney Australia between August 2008 and April 2009. Women were asked to report whether they had the onset of a new infection in the seven days prior to completing the questionnaire, and were asked details of symptoms and medication taken.

Deleted:

### *Results*

A total of 737 women at least 20 weeks pregnant completed the survey; 94% of women approached. Five per cent of the questionnaires completed reported the onset of an infection in the seven days prior to survey completion. When symptoms were analysed, 3.5% of women were classified as having a moderate or severe infection in the past seven days. The most common infection reported was a cold/upper respiratory tract infection followed by gastroenteritis. Women pregnant with their first child had a lower rate of self-reported infection than women who had other children (2.9% vs 7.2%).

### *Conclusions*

These results can be used to inform future research examining acute infection as a trigger for pregnancy complications.

**Key words:** pregnancy, infection, prevalence, obstetrics, crossover studies

Deleted: incidence

## Article summary

### Article focus

- Survey to ascertain the period prevalence of self-reported new infections in any seven day period during the second half of pregnancy
- Information regarding type of infection and medication taken to treat infection were also collected

Deleted: incidence

### Key message:

- Five per cent of women at least 20 weeks pregnant reported the onset of a new infection in the prior seven days, 3.5% of these women had a moderate or severe infection
- Only 21% of women reporting an infection sought medical care while 65% took medication to treat the infection
- This information can be used to inform future research into acute infections as a possible trigger for pregnancy complications such as pre-eclampsia.

### Strengths and limitations of this study:

- Strengths include the estimate of prevalence of infection in a short-term window of time rather than at any time during pregnancy to inform research into acute triggers of pregnancy complications, and the use of information regarding symptoms and medication taken to distinguish between mild and more severe infections.
- Limitations include the use of self-reported infection however this is a tool that has previously been used to report infection in a number of populations.

Deleted: incidence

**Funding Statement**

Samantha Lain is supported by a National Health and Medical Research Council (NHMRC) Postgraduate Scholarship (571227). Christine Roberts is supported by a National Health and Medical Research Council (NHMRC) Senior Research Fellowship. Jane Ford is supported by an NHMRC Capacity Building Grant in Population Health Research.

**Competing interests statement**

The author(s) declare that they have no competing interests.

**Authors' contributions and acknowledgements**

SJL designed and administered the survey, analysed data and drafted manuscript. CLR and JBF developed the study and helped design survey. CLR, JBF, JVT and JW contributed to data analysis and interpretation. All authors edited the manuscript and gave final approval of the version to be published. We wish to acknowledge the help of research midwives Kristen Rickard, Jill Milligan and Jocelyn Segley with administering surveys in the antenatal clinic.

## Background

Acute infections during pregnancy are associated with adverse outcomes including miscarriage, preterm prelabour rupture of membranes, preterm birth and stillbirth<sup>1-3</sup>.

Epidemiological evidence suggests that maternal infections may precipitate other complications of pregnancy including preeclampsia<sup>4</sup>. Early pregnancy evokes a mild and limited systemic inflammatory response with increased levels of pro-

inflammatory mediators such as prostaglandin E<sub>2</sub> (PGE<sub>2</sub>), tumor necrosis factor (TNF)- $\alpha$ <sup>5</sup>, interleukins 1 and 6.<sup>6,7</sup> These inflammatory mediators promote vascular remodelling and placental invasion, necessary in early pregnancy to ensure adequate fetal growth. The placenta reaches its full size by about 20 weeks, by which time,

vascular remodelling is complete and a concurrent decrease in circulating inflammatory markers has been observed.<sup>8-10</sup> In clinically normal pregnancies, maternal inflammation remains subdued until the onset of labour, when PGE<sub>2</sub> and proinflammatory cytokines mediate the ripening of the cervix, rupture of membranes, and myometrial contractility.<sup>11,12</sup> Therefore, acute infection may trigger perturbations in the temporal control of maternal inflammation, causing adverse pregnancy outcomes.<sup>13,14</sup> The maternal immune response to such an infection could mimic the cytokine milieu involved in the onset of labour.

Previous studies in pregnancy have centred on specific infections such as urinary tract infection and periodontal disease rather than investigating prevalence of all acute infections which may evoke an inflammatory response. Acute infectious episodes are known to increase the risk of cardiovascular diseases (CVD) including the risk of first-time myocardial infarction and stroke. Studies of these diseases suggest the effect of infection may be generic and not linked to specific types of infection.<sup>15</sup> The current

Deleted: incidence

1  
2 study arose out of the design phase of a similar study among pregnant women, to  
3  
4 investigate the possible role of infection and other acute triggers in the onset of  
5  
6 preeclampsia, an acute hypertensive disorder of pregnancy. An accurate estimate of  
7  
8 the prevalence rate of infections during the second half of pregnancy (when women  
9  
10 are at risk of preeclampsia) is necessary to calculate the study sample size; a simple  
11  
12 overall infection rate will not suffice when assessing acute triggers. Few studies have  
13  
14 assessed the prevalence of acute infections during pregnancy and none have addressed  
15  
16 the specific issue of timing during pregnancy<sup>4</sup>. Use of 'infection at any time during  
17  
18 during pregnancy' may result in systematic misclassification of exposure and dilution  
19  
20 of the true risk of complications occurring later in pregnancy. The aim of this current  
21  
22 study is to ascertain the period prevalence of self-reported new acute infections in any  
23  
24 seven day period during the second half of pregnancy.  
25

Deleted: incidence

Deleted: incidence

Deleted: incidence

## 26 27 **Methods**

28  
29 This cross-sectional study was conducted in the antenatal clinic of a teaching hospital  
30  
31 with tertiary obstetric and neonatal care facilities in Sydney, Australia between  
32  
33 August 2008 and April 2009. Methods have been described in detail previously in a  
34  
35 separate report of recent activities during pregnancy<sup>16</sup>. Briefly, women who were at  
36  
37 least 20 weeks pregnant and able to complete the questionnaire in English were  
38  
39 eligible. Women were approached in the antenatal clinic by a trained researcher not  
40  
41 involved in their medical care and completed a short questionnaire after giving  
42  
43 informed consent. The questionnaire was developed from a review of literature and  
44  
45 discussion with clinical staff and was piloted prior to study commencement.  
46  
47  
48  
49

50 The questionnaire asked women about demographic characteristics and whether they  
51  
52 had an infection during their pregnancy. Other studies have similarly identified recent  
53  
54  
55  
56  
57  
58  
59  
60

1  
2 infections using self-report<sup>17-21</sup> and concordance studies find this to be reliable<sup>22-25</sup>. In  
3  
4 the questionnaire, infection was defined as “symptoms lasting more than 24 hours that  
5  
6 you think were caused by an infection” and onset of the most recent infection was  
7  
8 identified as in the last 7, 8-14 or >14 days. Detailed information was only asked for  
9  
10 the new infections in the last 7 days. Participants were also prompted with a list of  
11  
12 examples such as a cold or flu, urinary tract infection, thrush, tooth abscess or an  
13  
14 infected wound when considering if they had an infection in the past seven days. The  
15  
16 questionnaire sought information about infection in the seven days prior to its  
17  
18 completion, so women were eligible to complete the survey more than once,  
19  
20 providing there was at least fourteen days between each questionnaire. If the women  
21  
22 responded that they had an infection in the last 7 days they were asked to record  
23  
24 perceived severity (mild, moderate or severe) of symptoms from a provided list (see  
25  
26 Figure 1). Details were also collected regarding medical advice sought, tests received  
27  
28 and medication taken for their infection. Details of symptoms and medication were  
29  
30 used to analyse severity of infections. Women who had taken antibiotics or had three  
31  
32 or more symptoms that they rated as moderate or severe were classified as having a  
33  
34 ‘moderate/severe’ infection. As the timing of the onset of infection was important,  
35  
36 women were given a calendar to help prompt them with the date of onset of infection  
37  
38 and were also asked how confident they were of the date the infection first appeared.  
39  
40  
41

42  
43 Survey data were analysed using frequency tabulations and contingency table  
44  
45 analyses. Stratified analysis, using chi square tests, examined the impact of gestational  
46  
47 age, parity, plurality, maternal education and other medical conditions on the  
48  
49 prevalence of infection. This study was approved by the Northern Sydney and  
50  
51 Central Coast Human Research Ethics Committee.  
52  
53  
54  
55  
56  
57  
58  
59  
60

Deleted: incidence



## Results

Among women who were at least 20 weeks pregnant approached to complete the survey, 738 (94%) agreed to participate; 97% when approached for the first time and 87% when approached to complete the survey for a subsequent time. A total of 737 surveys were completed, including 161 women completed the survey more than once. The significant differences between women completing the survey more than once and those who only completed one survey were increased gestational age, women with multiple pregnancies and women with university degrees<sup>16</sup>. The majority of the women that completed the survey were over 30 years of age, had a University degree, and were having their first baby (see Table 1).

Forty per cent of women surveyed said that they had had an infection at some stage during their pregnancy. Five per cent of the surveys completed reported the onset of an infection in the seven days prior to survey completion (see Table 2) and 5.7% reported the onset of an infection 7 to 14 days before completing survey. For women who reported an infection in the seven days prior to completing the survey, the most common infection was a cold/upper respiratory tract infection with an prevalence rate of 2.6%, followed by gastroenteritis or vomiting (0.7%), influenza (0.5%), candidiasis (0.4%) and urinary tract infection (0.4%). When only 'moderate/severe' infections were examined, the weekly prevalence of any new infection decreased to 3.5% and the prevalence of a cold/upper respiratory tract infection in the seven days prior to survey completion decreased to 1.2%.

Table 2 shows the weekly prevalence of infections by demographic and pregnancy variables. The prevalence of infection differed significantly by parity, plurality and

Deleted: incidence

Deleted: incidence

Deleted: incidence

Deleted: incidence

Deleted: incidence

1  
2 for women who had high blood pressure. Less women who were pregnant for the first  
3 time reported the onset of an infection compared to women who were pregnant for a  
4 second or subsequent time (2.9% vs 7.2%,  $p = 0.008$ ). Women who were pregnant  
5 with twins reported a higher prevalence of infection than women pregnant with a  
6 singleton (16.1% vs 4.5%,  $p = 0.004$ ), however there was no difference between  
7 groups in the prevalence of moderate/severe infection. Women that reported having a  
8 hypertensive disorder of pregnancy reported more infection than women without a  
9 medical condition (15.3% vs 4.6%,  $p = 0.01$ ).  
10  
11  
12  
13  
14  
15  
16  
17  
18  
19  
20

Deleted: incidence

Deleted: incidence

21 Of those women reporting an infection in the seven days prior to survey completion,  
22 the proportion who sought medical advice or took medication are outlined in Table 3.  
23 Twenty one per cent of women with an infection saw a health care professional and  
24 65% took some type of medication to treat the infection. Most commonly  
25 paracetamol /acetaminophen was taken, followed by antibiotics and 5% of women  
26 with an infection reported taking aspirin. Just over 50% of women reporting an  
27 infection stated that they had a fever and a third of these women reported having their  
28 temperature taken. The two women that reported having an investigative test  
29 performed had urine samples taken for urinary tract infections. The highest  
30 prevalence of infection in the seven days prior to the survey was in the southern  
31 hemisphere winter month of August (11.5%) while January (summer) had the lowest  
32 infection rate (0.6%). Most women (92%) were confident or very confident of the  
33 date when symptoms of infection first appeared.  
34  
35  
36  
37  
38  
39  
40  
41  
42  
43  
44  
45  
46

Deleted: incidence

## 47 Discussion

48 This is the first study to look at the prevalence of infection in a seven day window in  
49 pregnant women. There are a number of studies that report the rate of selected  
50  
51  
52  
53  
54  
55  
56  
57  
58  
59  
60

Deleted: incidence

1  
2 infections at any time during pregnancy and it is necessary to estimate weekly rates  
3 for comparison to these studies, assuming a constant rate of infection by week of  
4 gestation. Our study found a lower rate of self-reported infection during the whole  
5 pregnancy (40%) than Collier *et al*<sup>17</sup> (64%) however they included first trimester.  
6  
7 Weekly rates for specific infections in pregnancy reported in other studies include:  
8  
9 urinary tract infection 0.2% to 0.5%<sup>17,26,27</sup> (similar to 0.4% reported in our study),  
10  
11 gastroenteritis 0.8%<sup>20</sup> (0.7% in this study), influenza 0.1%<sup>27</sup> (0.5% in this study),  
12  
13 acute respiratory infectious disease 0.2%<sup>28</sup> and the common cold 0.4%<sup>29</sup> (compared to  
14  
15 1.2% of moderate/severe upper respiratory tract infections reported in this study).  
16  
17  
18  
19

20 Our study has a higher prevalence rate for the common cold however a population-  
21 based cohort study in Canada found the weekly rate of acute respiratory illness severe  
22 enough to require a physician visit ranged from 1.1% to 1.9%<sup>30</sup>, similar to the  
23 prevalence rate of severe colds observed in this study. As each completed  
24 questionnaire was anonymous, we could not determine whether any of the infections  
25 were recurrent and it is possible that some of the reported infections were chronic  
26 rather than acute.  
27  
28  
29  
30  
31  
32  
33  
34  
35

36 We found the prevalence of acute infections was higher for women who had  
37 previously been pregnant and, for mild infections, women with twin pregnancies.  
38 Children are prone to developing infections<sup>20</sup> which could be easily transferred to the  
39 mother. Women pregnant with multi-fetal pregnancies may have increased antenatal  
40 visits and surveillance by clinicians, and this may lead to an increase in the reporting  
41 of infections. An unexpected yet interesting finding from the survey was the  
42 increased prevalence of infection in women with a hypertensive disorder of  
43 pregnancy, although this rate is based on small numbers and the confidence intervals  
44  
45  
46  
47  
48  
49  
50  
51  
52  
53  
54  
55  
56  
57  
58  
59  
60

Deleted: incidence

Deleted: incidence

Deleted: incidence

Deleted: incidence

1  
2 around the prevalence estimate are very wide. This result is of particular interest  
3  
4 because the estimate of prevalence of infection in pregnant women from this survey is  
5  
6 to inform future research about infection and preeclampsia. The authors propose using  
7  
8 the prevalence estimates of infection obtained from the current study for a case-  
9  
10 crossover study investigating the role of acute infection and other acute triggers in the  
11  
12 onset of preeclampsia. The current study however was not designed to examine  
13  
14 infection rates in pregnant women with hypertension. In this cross-sectional survey it  
15  
16 was not possible to establish whether the hypertension or the infection occurred first.  
17  
18

Deleted: incidence

Deleted: incidence

Deleted: incidence

19  
20 The reliance upon self-report of infection is a potential limitation of the study with  
21  
22 only 21% of women reporting an infection seeking medical attention, however mild  
23  
24 infections that do not come to medical attention may still be a risk for pregnancy  
25  
26 complications<sup>17</sup>. Self-report of infection has been used to estimate the rates of  
27  
28 gastroenteritis<sup>20</sup>, influenza and fever<sup>19 21</sup>, and genitourinary infections<sup>18</sup> in pregnant  
29  
30 women. Banhidý *et al* collected information about infection both from prospectively  
31  
32 collected medical data and self-report from women in a post-natal questionnaire<sup>25 28</sup>.  
33  
34 They found that 74% of women reporting an acute respiratory disease during  
35  
36 pregnancy had the disease recorded in their medical records<sup>28</sup> and 95% of women  
37  
38 with a medically recorded urinary tract infection self-reported the infection<sup>25</sup>. Our  
39  
40 study also collected information about severity of symptoms experienced and  
41  
42 medication taken which helped to distinguish between mild and more severe  
43  
44 infections. This stratified analysis of reported infections increases the certainty that  
45  
46 women who experienced a severe infection truly did have an infection.  
47  
48  
49  
50  
51  
52  
53  
54  
55  
56  
57  
58  
59  
60

1  
2  
3 The use of self reported data may be affected by recall bias. One study using self-  
4 report of any infection during pregnancy recommended ‘future studies should  
5 emphasize the importance of interviewing women as early as possible’<sup>17</sup> as mother’s  
6 tend to under-report infection when recalling information after birth<sup>31</sup>. The short  
7 window of time to recall details of infection in our study (seven days) minimises this  
8 recall bias.  
9  
10  
11  
12  
13

14  
15  
16 A further limitation of this study is that the study population is older than the general  
17 population of pregnant women in Australia<sup>26</sup>, is highly educated and was restricted to  
18 English speaking participants. Although this may impact the generalisability of the  
19 results, such characteristics are representative of the women that attend this hospital.  
20 Notably age or education level did not have a significant effect on the total infection  
21 rate, although a larger sample size may show an association between these factors and  
22 sexually transmitted infections. Strengths of this paper include the investigation of  
23 any infection rather than being limited to single infections; and the investigation of  
24 acute rather than chronic infections which may be over-estimated if weekly  
25 prevalence rates rather than date of infection onset are used.  
26  
27  
28  
29  
30  
31  
32  
33  
34 Deleted: incidence

### 35 36 37 **Conclusions**

38  
39  
40 This survey is the first study to estimate the weekly prevalence of recently acquired  
41 acute infections in a population of pregnant women. The results of this study will be  
42 used to inform future research examining the association between acute infection and  
43 pregnancy complications such as preeclampsia. This study also informs clinicians  
44 about the types of infections and medications pregnant women are exposed to.  
45  
46  
47  
48  
49  
50  
51  
52  
53  
54  
55  
56  
57  
58  
59  
60

Deleted: incidence

Table 1: The characteristics of women surveyed

|                                                               | N (%)      |
|---------------------------------------------------------------|------------|
| <b>All surveys completed</b>                                  | 737        |
| Women that have completed survey only once                    | 576 (78.2) |
| <b>Maternal age</b>                                           |            |
| < 25 years                                                    | 55 (7.5)   |
| 25 – 34 years                                                 | 430 (58.3) |
| ≥ 35 years                                                    | 247 (33.5) |
| <b>Gestational age</b>                                        |            |
| 20 – 28 weeks                                                 | 241 (32.7) |
| 29 – 34 weeks                                                 | 172 (23.3) |
| 35 – 42 weeks                                                 | 324 (44.0) |
| <b>Plurality</b>                                              |            |
| Singleton                                                     | 705 (95.7) |
| Twins/Triplets                                                | 31 (4.2)   |
| <b>Parity</b>                                                 |            |
| Nulliparous                                                   | 376 (51.0) |
| Multiparous                                                   | 360 (48.8) |
| <b>Highest level of education completed</b>                   |            |
| Without University degree                                     | 313 (42.5) |
| With University degree                                        | 422 (57.3) |
| <b>Medical conditions (pre-existing or pregnancy related)</b> |            |

|                       |            |
|-----------------------|------------|
| No medical conditions | 564 (76.5) |
| Asthma                | 69 (9.4)   |
| High blood pressure   | 25 (3.4)   |
| Diabetes              | 46 (6.2)   |
| Other                 | 32 (4.3)   |

**Smoking status**

|                                    |            |
|------------------------------------|------------|
| Did not smoke during pregnancy     | 708 (96.1) |
| Smoked cigarettes during pregnancy | 29 (3.9)   |

---

Table 2: The characteristics of women without and without a self-reported infection, and the weekly prevalence rate, per 100 surveys, of infection in the seven days prior to completing the survey

Deleted: incidence

Deleted: incidence

|                                             | Women with self-reported infection | Weekly <u>prevalence</u> of self-reported infection |
|---------------------------------------------|------------------------------------|-----------------------------------------------------|
|                                             | N                                  | % (95% CI)                                          |
| <b>All surveys completed</b>                | 37                                 | 5.0 [3.4 – 6.6]                                     |
| Women that have completed survey only once  | 28                                 | 4.8 [3.1 – 6.6]                                     |
| <b>Maternal age</b>                         |                                    |                                                     |
| < 25 years                                  | 3                                  | 5.5 [0.0 – 10.7]                                    |
| 25 – 34 years                               | 18                                 | 4.2 [2.3 – 6.1]                                     |
| ≥ 35 years                                  | 16                                 | 6.5 [3.4 – 9.6]                                     |
| <b>Gestational age</b>                      |                                    |                                                     |
| 20 – 28 weeks                               | 10                                 | 4.2 [1.6 – 6.7]                                     |
| 29 – 34 weeks                               | 9                                  | 5.2 [1.9 – 8.6]                                     |
| 35 – 42 weeks                               | 18                                 | 5.6 [3.0 – 8.1]                                     |
| <b>Plurality</b>                            |                                    |                                                     |
| Singleton                                   | 32                                 | 4.5 [3.0 – 6.1]                                     |
| Twins/Triplets                              | 5                                  | 16.1 [2.4 – 29.8]                                   |
| <b>Parity</b>                               |                                    |                                                     |
| Nulliparous                                 | 11                                 | 2.9 [1.2 – 4.6]                                     |
| Multiparous                                 | 26                                 | 7.2 [4.5 – 9.9]                                     |
| <b>Highest level of education completed</b> |                                    |                                                     |



|                           |    |                 |
|---------------------------|----|-----------------|
| Without University degree | 14 | 4.5 [2.2 – 6.8] |
| With University degree    | 23 | 5.5 [3.3 – 7.6] |

**Medical conditions (pre-existing  
or pregnancy related)**

|                       |    |                   |
|-----------------------|----|-------------------|
| No medical conditions | 26 | 4.6 [2.9 – 6.3]   |
| Asthma                | 4  | 5.8 [0.1 – 11.5]  |
| High blood pressure   | 4  | 15.3 [0.5 – 30.2] |
| Diabetes              | 3  | 6.5 [0.0 – 13.9]  |
| Other                 | 0  | 0.0               |

**Smoking status**

|                                    |    |                  |
|------------------------------------|----|------------------|
| Did not smoke during pregnancy     | 36 | 5.1, [3.5 – 6.7] |
| Smoked cigarettes during pregnancy | 1  | 3., [0.0 – 10.5] |

---

1  
2 Table 3. Medication taken or health advice sought by women with self-reported  
3 infection  
4  
5

|                                      | N  | %     |
|--------------------------------------|----|-------|
|                                      | 37 |       |
| <i>Medication taken</i>              |    |       |
| Paracetamol /acetaminophen           | 12 | 32.4% |
| Aspirin                              | 2  | 5.4%  |
| Antibiotics                          | 7  | 18.9% |
| None                                 | 3  | 8.1%  |
| Other*                               | 13 | 35.1% |
| <i>Medical Care</i>                  |    |       |
| Advice sought from doctor            | 8  | 21.6% |
| Medical test/investigation performed | 2  | 5.4%  |
| Temperature taken                    | 7  | 18.9% |

\*Includes antifungal cream, antibacterial throat lozenges and gargle

1  
2  
3  
4  
5  
6  
7  
8  
9  
10  
11  
12  
13  
14  
15  
16  
17  
18  
19  
20  
21  
22  
23  
24  
25  
26  
27  
28  
29  
30  
31  
32  
33  
34  
35  
36  
37  
38  
39  
40  
41  
42  
43  
44  
45  
46  
47  
48  
49  
50  
51  
52  
53  
54  
55  
56  
57  
58  
59  
60

Figure 1. List of symptoms that participants who reported having an infection were asked about details of severity (none, mild, moderate or severe)

See attached file

For peer review only

1. Brocklehurst P. Infection and preterm delivery. *BMJ* 1999;318(7183):548-9.
2. Goldenberg RL, Hauth JC, Andrews WW. Intrauterine infection and preterm delivery. *N Engl J Med* 2000;342(20):1500-7.
3. Goldenberg RL, McClure EM, Saleem S, Reddy UM. Infection-related stillbirths. *Lancet* 2010;375(9724):1482-90.
4. Conde-Agudelo A, Villar J, Lindheimer M. Maternal infection and risk of preeclampsia: systematic review and metaanalysis. *Am J Obstet Gynecol* 2008;198(1):7-22.
5. Kupfermanc MJ, Peaceman AM, Wigton TR, Tamura RK, Rehnberg KA, Socol ML. Immunoreactive tumor necrosis factor-alpha is elevated in maternal plasma but undetected in amniotic fluid in the second trimester. *Am J Obstet Gynecol* 1994;171(4):976-9.
6. Rustveld LO, Kelsey SF, Sharma R. Association between maternal infections and preeclampsia: a systematic review of epidemiologic studies. *Matern Child Health J* 2008;12(2):223-42.
7. Gabay C, Kushner I. Acute-phase proteins and other systemic responses to inflammation. *N Engl J Med* 1999;340(6):448-54.
8. Elenkov IJ, Wilder RL, Bakalov VK, Link AA, Dimitrov MA, Fisher S, et al. IL-12, TNF-alpha, and hormonal changes during late pregnancy and early postpartum: implications for autoimmune disease activity during these times. *J Clin Endocrinol Metab* 2001;86(10):4933-8.
9. Luppi P, Haluszczak C, Betters D, Richard CA, Trucco M, DeLoia JA. Monocytes are progressively activated in the circulation of pregnant women. *J Leukoc Biol* 2002;72(5):874-84.
10. McCracken SA, Hadfield K, Rahimi Z, Gallery ED, Morris JM. NF-kappaB-regulated suppression of T-bet in T cells represses Th1 immune responses in pregnancy. *Eur J Immunol* 2007;37(5):1386-96.
11. Romero R, Munoz H, Gomez R, Parra M, Polanco M, Valverde V, et al. Increase in prostaglandin bioavailability precedes the onset of human parturition. *Prostaglandins Leukot Essent Fatty Acids* 1996;54(3):187-91.
12. Yuan M, Jordan F, McInnes IB, Harnett MM, Norman JE. Leukocytes are primed in peripheral blood for activation during term and preterm labour. *Mol Hum Reprod* 2009;15(11):713-24.
13. Redman CW, Sargent IL. Latest advances in understanding preeclampsia. *Science* 2005;308(5728):1592-4.
14. von Dadelszen P, Magee LA. Could an infectious trigger explain the differential maternal response to the shared placental pathology of preeclampsia and normotensive intrauterine growth restriction? *Acta Obstet Gynecol Scand* 2002;81(7):642-648.
15. Smeeth L, Thomas SL, Hall AJ, Hubbard R, Farrington P, Vallance P. Risk of myocardial infarction and stroke after acute infection or vaccination. *N Engl J Med* 2004;351(25):2611-8.
16. Lain SJ, Ford JB, Hadfield RM, Roberts CL. A prevalence survey of every-day activities in pregnancy. *BMC Pregnancy and Childbirth* 2010;10(41).
17. Collier SA, Rasmussen SA, Feldkamp ML, Honein MA. Prevalence of self-reported infection during pregnancy among control mothers in the National Birth Defects Prevention Study. *Birth Defects Res A Clin Mol Teratol* 2009;85(3):193-201.

18. Feldkamp ML, Reefhuis J, Kucik J, Krikov S, Wilson A, Moore CA, et al. Case-control study of self reported genitourinary infections and risk of gastroschisis: findings from the national birth defects prevention study, 1997-2003. *BMJ* 2008;336(7658):1386-7.
19. Li Z, Ren A, Liu J, Pei L, Zhang L, Zhanying G, et al. Maternal Flu or Fever, Medication Use, and Neural Tube Defects: A Population-Based Case-Control Study in Northern China. *Birth Defects Res A Clin Mol Teratol* 2007;79:295-300.
20. Ludvigsson JF. Effect of gastroenteritis during pregnancy on neonatal outcome. *Eur J Clin Microbiol Infect Dis* 2001;20(12):843-9.
21. Lynberg MC, Khoury MJ, Lu X, Cocian T. Maternal Flu, Fever, and the Risk of Neural Tube Defects: A Population-based Case-Control Study. *Am J Epidemiol* 1994;140:244-55.
22. Eskeland B, Baerheim A, Ulvik R, Hunnskaar S. Influence of mild infections on iron status parameters in women of reproductive age. *Scandinavian Journal of Primary Health Care* 2002;20(1):50-56.
23. Tremblay E, Gregoire J-P, Moisan J. Validite d'un questionnaire autoadministre sur l'utilisation d'antibiotiques. *Can J Clin Pharmacol* 1999;6(4):203-211.
24. Rahman A, Gibney L, Person SD, Williams OD, Kiefe C, Jolly P, et al. Validity of self-reports of reasons for hospitalization by young adults and risk factors for discordance with medical records. *American Journal of Epidemiology* 2005;162(5):491-498.
25. Banhidy F, Acs N, Puho EH, Czeizel AE. Pregnancy complications and birth outcomes of pregnant women with urinary tract infections and related drug treatments. *Scand J Infect Dis* 2007;39(5):390-7.
26. Villar J, Carroli G, Wojdyla D, Abalos E, Giordano D, Ba'aqeel H, et al. Preeclampsia, gestational hypertension and intrauterine growth restriction, related or independent conditions? *Am J Obstet Gynecol* 2006;194(4):921-31.
27. Acs N, Banhidy F, Puho E, Czeizel AE. Pregnancy complications and delivery outcomes of pregnant women with influenza. *J Matern Fetal Neonatal Med* 2006;19(3):135-40.
28. Banhidy F, Acs N, Puho EH, Czeizel AE. Maternal acute respiratory infectious diseases during pregnancy and birth outcomes. *Eur J Epidemiol* 2008;23(1):29-35.
29. Banhidy F, Acs N, Puho E, Czeizel AE. Pregnancy complications and delivery outcomes of pregnant women with common cold. *Cent Eur J Public Health* 2006;14(1):10-4.
30. Dodds L, McNeil SA, Fell DB, Allen VM, Coombs A, Scott J, et al. Impact of influenza exposure on rates of hospital admissions and physician visits because of respiratory illness among pregnant women. *Cmaj* 2007;176(4):463-8.
31. Voldsgaard P, Schiffman J, Mednick S, Rodgers B, Christensen H, Bredkjaer S, et al. Accuracy of retrospective reports of infections during pregnancy. *International Journal of Methods in Psychiatric Research* 2002;11(4):184-186.
32. Laws P, Hilder L. Australia's mothers and babies 2006. *Perinatal statistics series no. 22*: AIHW National Perinatal Statistics Unit, 2008.

**General symptoms for infection**

- Fever
- Night sweats / chills
- Fatigue / weakness

**Upper respiratory tract infection (e.g. A cold, influenza, tonsillitis)**

- Runny nose or blocked nose
- Sneezing
- Sore throat
- Headache, sinus/face pain
- Swollen glands

**Lower respiratory tract infection (e.g. Pneumonia, bronchitis)**

- Dry cough
- Productive cough (coughing up phlegm or mucous)
- Shortness of breath
- Chest pain
- Pain when breathing

**Urinary tract infection (e.g. Bladder or kidney infections)**

- Burning sensation when urinating
- Cloudy or foul-smelling urine
- Pus or blood in urine
- Frequent urination
- Urgency, pressure or pain in bladder

**Genital tract infection (e.g. Thrush)**

- Abnormal vaginal discharge with an unpleasant smell
- Intense itching, swelling and irritation

**Gastro-intestinal infection (e.g. Food poisoning)**

- Nausea, vomiting (other than morning sickness)
- Diarrhea
- Stomach pain

**Other infections**

- Tooth abscess
- Infected cut or scratch / Wound infection
- Skin infection / boils

207x218mm (96 x 96 DPI)

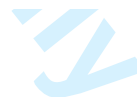

STROBE 2007 (v4) Statement—Checklist of items that should be included in reports of *cross-sectional studies*

| Section/Topic                | Item # | Recommendation                                                                                                                                                                       | Reported on page # |
|------------------------------|--------|--------------------------------------------------------------------------------------------------------------------------------------------------------------------------------------|--------------------|
| Title and abstract           | 1      | (a) Indicate the study's design with a commonly used term in the title or the abstract                                                                                               | 2                  |
|                              |        | (b) Provide in the abstract an informative and balanced summary of what was done and what was found                                                                                  | 2                  |
| <b>Introduction</b>          |        |                                                                                                                                                                                      |                    |
| Background/rationale         | 2      | Explain the scientific background and rationale for the investigation being reported                                                                                                 | 5, 6               |
| Objectives                   | 3      | State specific objectives, including any prespecified hypotheses                                                                                                                     | 6                  |
| <b>Methods</b>               |        |                                                                                                                                                                                      |                    |
| Study design                 | 4      | Present key elements of study design early in the paper                                                                                                                              | 6                  |
| Setting                      | 5      | Describe the setting, locations, and relevant dates, including periods of recruitment, exposure, follow-up, and data collection                                                      | 6                  |
| Participants                 | 6      | (a) Give the eligibility criteria, and the sources and methods of selection of participants                                                                                          | 6                  |
| Variables                    | 7      | Clearly define all outcomes, exposures, predictors, potential confounders, and effect modifiers. Give diagnostic criteria, if applicable                                             | 7                  |
| Data sources/<br>measurement | 8*     | For each variable of interest, give sources of data and details of methods of assessment (measurement). Describe comparability of assessment methods if there is more than one group | 7                  |
| Bias                         | 9      | Describe any efforts to address potential sources of bias                                                                                                                            | 7                  |
| Study size                   | 10     | Explain how the study size was arrived at                                                                                                                                            | 7                  |
| Quantitative variables       | 11     | Explain how quantitative variables were handled in the analyses. If applicable, describe which groupings were chosen and why                                                         | 7                  |
| Statistical methods          | 12     | (a) Describe all statistical methods, including those used to control for confounding                                                                                                | 7                  |
|                              |        | (b) Describe any methods used to examine subgroups and interactions                                                                                                                  | 7                  |
|                              |        | (c) Explain how missing data were addressed                                                                                                                                          | n/a                |
|                              |        | (d) If applicable, describe analytical methods taking account of sampling strategy                                                                                                   | n/a                |
|                              |        | (e) Describe any sensitivity analyses                                                                                                                                                | 7                  |
| <b>Results</b>               |        |                                                                                                                                                                                      |                    |

|                          |     |                                                                                                                                                                                                              |        |
|--------------------------|-----|--------------------------------------------------------------------------------------------------------------------------------------------------------------------------------------------------------------|--------|
| Participants             | 13* | (a) Report numbers of individuals at each stage of study—eg numbers potentially eligible, examined for eligibility, confirmed eligible, included in the study, completing follow-up, and analysed            | 8      |
|                          |     | (b) Give reasons for non-participation at each stage                                                                                                                                                         | 8      |
|                          |     | (c) Consider use of a flow diagram                                                                                                                                                                           | n/a    |
| Descriptive data         | 14* | (a) Give characteristics of study participants (eg demographic, clinical, social) and information on exposures and potential confounders                                                                     | 14     |
|                          |     | (b) Indicate number of participants with missing data for each variable of interest                                                                                                                          | 14     |
| Outcome data             | 15* | Report numbers of outcome events or summary measures                                                                                                                                                         | 16     |
| Main results             | 16  | (a) Give unadjusted estimates and, if applicable, confounder-adjusted estimates and their precision (eg, 95% confidence interval). Make clear which confounders were adjusted for and why they were included | 16, 17 |
|                          |     | (b) Report category boundaries when continuous variables were categorized                                                                                                                                    | 14, 16 |
|                          |     | (c) If relevant, consider translating estimates of relative risk into absolute risk for a meaningful time period                                                                                             | n/a    |
| Other analyses           | 17  | Report other analyses done—eg analyses of subgroups and interactions, and sensitivity analyses                                                                                                               | 16     |
| <b>Discussion</b>        |     |                                                                                                                                                                                                              |        |
| Key results              | 18  | Summarise key results with reference to study objectives                                                                                                                                                     | 10     |
| Limitations              | 19  | Discuss limitations of the study, taking into account sources of potential bias or imprecision. Discuss both direction and magnitude of any potential bias                                                   | 11     |
| Interpretation           | 20  | Give a cautious overall interpretation of results considering objectives, limitations, multiplicity of analyses, results from similar studies, and other relevant evidence                                   | 10     |
| Generalisability         | 21  | Discuss the generalisability (external validity) of the study results                                                                                                                                        | 11, 12 |
| <b>Other information</b> |     |                                                                                                                                                                                                              |        |
| Funding                  | 22  | Give the source of funding and the role of the funders for the present study and, if applicable, for the original study on which the present article is based                                                | 4      |

\*Give information separately for cases and controls in case-control studies and, if applicable, for exposed and unexposed groups in cohort and cross-sectional studies.

**Note:** An Explanation and Elaboration article discusses each checklist item and gives methodological background and published examples of transparent reporting. The STROBE checklist is best used in conjunction with this article (freely available on the Web sites of PLoS Medicine at <http://www.plosmedicine.org/>, Annals of Internal Medicine at <http://www.annals.org/>, and Epidemiology at <http://www.epidem.com/>). Information on the STROBE Initiative is available at [www.strobe-statement.org](http://www.strobe-statement.org).
